# Supplementary material for: Effect of the addition of a mental health specialist for evaluation of undiagnosed patients in centres for rare diseases (ZSE-DUO): a prospective, controlled trial with a two-phase cohort design
Source: PubMed Central journal article supplement — eClinicalMedicine. 2023 Oct 6;65:102260. doi: 10.1016/j.eclinm.2023.102260 (PMC10579280; doi:10.1016/j.eclinm.2023.102260), 2023-10-06
Supplement: mmc4.pdf [file mmc4.pdf]

# **Duale Lotsenstruktur zur Abklärung unklarer Diagnosen in Zentren für Seltene Erkrankungen**

**/  
ZSE-DUO**

Prof. Dr. Helge Hebestreit,  
Zentrum für Seltene Erkrankungen – Referenzzentrum Nordbayern  
Universitätsklinikum Würzburg

Prof. Dr. Peter U Heuschmann  
Institut für Klinische Epidemiologie und Biometrie  
Universität Würzburg

Datum der Fassung: 04.09.2020

Status der Fassung: Version 1.3

# INHALTSVERZEICHNIS

|                                                                                          |           |
|------------------------------------------------------------------------------------------|-----------|
| <b>ALLGEMEINE INFORMATIONEN</b> .....                                                    | <b>4</b>  |
| Beteiligte Institutionen und verantwortliche Personen .....                              | 4         |
| Unterschriften .....                                                                     | 6         |
| Synopse.....                                                                             | 7         |
| <b>1. EINFÜHRUNG UND WISSENSCHAFTLICHE RATIONALE</b> .....                               | <b>10</b> |
| 1.1 Hintergrund.....                                                                     | 10        |
| 1.2 Fragestellungen und Begründung der Studie .....                                      | 12        |
| 1.3 Nutzen-Risiko-Abwägung .....                                                         | 13        |
| <b>2. STUDIENZIELE</b> .....                                                             | <b>13</b> |
| 2.1 Primäre Hypothese .....                                                              | 13        |
| 2.2 Sekundäre Hypothesen .....                                                           | 13        |
| <b>3. STUDIENDESIGN</b> .....                                                            | <b>14</b> |
| 3.1 ZSE-DUO: Konzept und Struktur.....                                                   | 14        |
| 3.2 Förderung .....                                                                      | 14        |
| 3.3 Art der Datenerfassung.....                                                          | 15        |
| 3.4 Zeitplan.....                                                                        | 16        |
| <b>4. STUDIENPOPULATION</b> .....                                                        | <b>18</b> |
| 4.1 Vorgehen zur Patientenauswahl.....                                                   | 18        |
| 4.2 Einschlusskriterien.....                                                             | 19        |
| 4.3 Ausschlusskriterien.....                                                             | 19        |
| <b>5. STUDIENABLAUF</b> .....                                                            | <b>19</b> |
| 5.1 Rekrutierung .....                                                                   | 19        |
| 5.2 Patientenaufklärung und -einwilligung .....                                          | 21        |
| 5.3 Datenerhebung zu Studienbeginn .....                                                 | 22        |
| 5.4 Kontaktaufnahme und Befragung zum Follow-up.....                                     | 24        |
| <b>6. PATIENTENSICHERHEIT</b> .....                                                      | <b>26</b> |
| 6.1 Unerwünschte Ereignisse (AE) / schwerwiegende unerwünschte Ereignisse<br>(SAE) ..... | 26        |
| <b>7. DATENVERARBEITUNG UND DATENSCHUTZ</b> .....                                        | <b>27</b> |
| 7.1 Datenmanagement und Datenschutz .....                                                | 27        |
| 7.2 Quelldaten und -material .....                                                       | 28        |
| 7.3 Papierbasierte CRFs .....                                                            | 28        |
| 7.4 eCRF .....                                                                           | 29        |
| 7.5 Erhebungen und Datenbankauszüge von Externa (Untergruppen von<br>Patienten) .....    | 30        |
| 7.6 Studiendatenbank Würzburg .....                                                      | 36        |
| 7.7 Studiendatenbank Hannover und Hamburg.....                                           | 37        |
| <b>8. BIOMETRISCHE ASPEKTE</b> .....                                                     | <b>38</b> |
| 8.1 Endpunkte .....                                                                      | 38        |
| 8.2 Verfahren zur Datenanalyse .....                                                     | 39        |

---

|                                                             |           |
|-------------------------------------------------------------|-----------|
| 8.3 Analysepopulationen .....                               | 39        |
| 8.4 Auswertungszeitpunkte.....                              | 39        |
| <b>9. QUALITÄTSSICHERUNG UND -KONTROLLE.....</b>            | <b>41</b> |
| <b>10. PUBLIKATION DER ERGEBNISSE .....</b>                 | <b>41</b> |
| <b>11. ETHISCHE GRUNDLAGEN .....</b>                        | <b>42</b> |
| 11.1 Ethikvotum.....                                        | 42        |
| 11.2 Probandenaufklärung .....                              | 42        |
| 11.3 Verwendung, Speicherung und Weitergabe der Daten ..... | 44        |
| <b>12. LITERATUR .....</b>                                  | <b>46</b> |
| <b>13. ANHANG .....</b>                                     | <b>48</b> |
| Patienteninformation.....                                   | 48        |
| Einwilligungserklärung.....                                 | 48        |
| Erhebungsinstrumente .....                                  | 48        |

## ALLGEMEINE INFORMATIONEN

### Beteiligte Institutionen und verantwortliche Personen

|                                                     |                                                                                                                                                                                                                                                                                                                                                                                                                                                                                                                                                                                                                                                                                                                                                                                                                             |
|-----------------------------------------------------|-----------------------------------------------------------------------------------------------------------------------------------------------------------------------------------------------------------------------------------------------------------------------------------------------------------------------------------------------------------------------------------------------------------------------------------------------------------------------------------------------------------------------------------------------------------------------------------------------------------------------------------------------------------------------------------------------------------------------------------------------------------------------------------------------------------------------------|
| Studienleitung:                                     | Prof. Dr. Helge Hebestreit,<br>Zentrum für Seltene Erkrankungen –<br>Referenzzentrum Nordbayern Universitätsklinikum<br>Würzburg                                                                                                                                                                                                                                                                                                                                                                                                                                                                                                                                                                                                                                                                                            |
| Konsortialpartner /<br>kooperierende Krankenkassen: | Konsortialpartner: (Universitäts-)Klinika mit ihren<br>Zentren für Seltene Erkrankungen in Aachen,<br>Bochum, Frankfurt, Hannover, Magdeburg/Halle,<br>Mainz, Münster, Regensburg, Tübingen, Ulm,<br>Würzburg.<br><br>Klinik für Psychosomatische Medizin und<br>Psychotherapie, LWL-Universitätsklinikum der Ruhr-<br>Universität Bochum<br><br>Institut für Klinische Epidemiologie und Biometrie,<br>Universität Würzburg<br><br>Center for Health Economics and Research<br>Hannover (CHERH), Medizinischen Hochschule<br>Hannover, Institut für Epidemiologie, Sozialmedizin<br>und Gesundheitssystemforschung<br><br>Institut für Medizinische Psychologie,<br>Universitätsklinikum Hamburg-Eppendorf<br><br>ACHSE e.V.,<br><br>Techniker Krankenkasse,<br><br>IKK gesund plus<br><br>Kooperationspartner: AOK Hessen |
| Studienkoordination:                                | Lisa Pfister / Prof. Dr. Helge Hebestreit                                                                                                                                                                                                                                                                                                                                                                                                                                                                                                                                                                                                                                                                                                                                                                                   |

|                                      |                                                                                                                                                                                                                                                                                                                                                                                                                                                                                                                                                                                                                                                                                                                                                                                                                                                                                                                                                                                                                                                     |
|--------------------------------------|-----------------------------------------------------------------------------------------------------------------------------------------------------------------------------------------------------------------------------------------------------------------------------------------------------------------------------------------------------------------------------------------------------------------------------------------------------------------------------------------------------------------------------------------------------------------------------------------------------------------------------------------------------------------------------------------------------------------------------------------------------------------------------------------------------------------------------------------------------------------------------------------------------------------------------------------------------------------------------------------------------------------------------------------------------|
| Koordination der Evaluation          | Dr. Kirsten Haas, Institut für Klinische Epidemiologie und Biometrie, Universität Würzburg                                                                                                                                                                                                                                                                                                                                                                                                                                                                                                                                                                                                                                                                                                                                                                                                                                                                                                                                                          |
| Weitere Projektbeteiligte Evaluation | <p>Prof. Dr. Peter U Heuschmann, Institut für Klinische Epidemiologie und Biometrie, Universität Würzburg</p> <p>Kathrin Ungethüm, Institut für Klinische Epidemiologie und Biometrie, Universität Würzburg</p> <p>Lilly Brandstetter, Institut für Klinische Epidemiologie und Biometrie, Universität Würzburg</p> <p>Prof. Dr. Christian Krauth, Center for Health Economics and Research Hannover (CHERH), Medizinischen Hochschule Hannover, Institut für Epidemiologie, Sozialmedizin und Gesundheitssystemforschung</p> <p>Kristina Schaubert, Center for Health Economics and Research Hannover (CHERH), Medizinischen Hochschule Hannover, Institut für Epidemiologie, Sozialmedizin und Gesundheitssystemforschung</p> <p>Anne-Marie Lapstich, Center for Health Economics and Research Hannover (CHERH), Medizinischen Hochschule Hannover, Institut für Epidemiologie, Sozialmedizin und Gesundheitssystemforschung</p> <p>Prof. Dr. Monika Bullinger, Institut für Medizinische Psychologie, Universitätsklinikum Hamburg-Eppendorf</p> |
| Datenmanagement:                     | <p>Udo Selig, Institut für Klinische Epidemiologie und Biometrie, Universität Würzburg</p> <p>Martina Haase, Institut für Klinische Epidemiologie und Biometrie, Universität Würzburg</p> <p>NN / Medizinische Hochschule Hannover</p> <p>NN / Universitätsklinikum Hamburg-Eppendorf</p>                                                                                                                                                                                                                                                                                                                                                                                                                                                                                                                                                                                                                                                                                                                                                           |

**Unterschriften****Prof. Dr. H. Hebestreit**

Zentrum für Seltene Erkrankungen -  
Referenzzentrum Nordbayern (ZESE)  
Universitätsklinikum Würzburg

**Prof. Dr. P. U. Heuschmann**

Institut für Klinische Epidemiologie und  
Biometrie (IKE-B)  
Universität Würzburg

**Dr. K. Haas**

Institut für Klinische Epidemiologie und  
Biometrie (IKE-B)  
Universität Würzburg

**K. Ungethüm**

Institut für Klinische Epidemiologie und  
Biometrie (IKE-B)  
Universität Würzburg

**Principal Investigator**

Zentrum für Seltene Erkrankungen

## Synopse

|                             |                                                                                                                                                                                                                                                                                                                                                                          |
|-----------------------------|--------------------------------------------------------------------------------------------------------------------------------------------------------------------------------------------------------------------------------------------------------------------------------------------------------------------------------------------------------------------------|
| Studientitel                | Duale Lotsenstruktur zur Abklärung unklarer Diagnosen in Zentren für Seltene Erkrankungen                                                                                                                                                                                                                                                                                |
| Kurzbezeichnung             | ZSE-DUO                                                                                                                                                                                                                                                                                                                                                                  |
| Studienziele                | Evaluierung der Einführung einer neuen Versorgungsform (NVF) für PatientInnen mit Verdacht auf seltene Erkrankung (SE)                                                                                                                                                                                                                                                   |
| Design                      | Prospektive Kohortenstudie mit Kontroll- und Interventionsgruppe, Beobachtungszeitraum 12 Monate                                                                                                                                                                                                                                                                         |
| Population                  | PatientInnen, mit Verdacht auf eine SE ohne gesicherte Diagnose, die im Studienzeitraum erstmalig ein Zentrum für Seltene Erkrankungen (ZSE) aufsuchen                                                                                                                                                                                                                   |
| Fallzahl                    | N = 1364 PatientInnen                                                                                                                                                                                                                                                                                                                                                    |
| Endpunkte                   | <ul style="list-style-type: none"> <li>• Anzahl/Anteil gesicherter Diagnosen</li> <li>• Zeit bis zur Diagnosestellung</li> <li>• Anteil PatientInnen mit gelungener Überleitung in die Regelversorgung</li> <li>• Diagnosekosten</li> <li>• Patientenzufriedenheit</li> <li>• Lebensqualität der PatientInnen</li> <li>• Zufriedenheit der behandelnden Ärzte</li> </ul> |
| Teilnehmende Studienzentren | <ul style="list-style-type: none"> <li>• Universitätsklinikum der RWTH Aachen</li> <li>• Universitätsmedizin der Ruhr-Universität Bochum in Kooperation mit dem LWL-Universitätsklinikum Bochum</li> <li>• Universitätsklinikum der Goethe-Universität Frankfurt</li> </ul>                                                                                              |

|                       |                                                                                                                                                                                                                                                                                                                                                                                                                                                                                                                                                                                                                                  |
|-----------------------|----------------------------------------------------------------------------------------------------------------------------------------------------------------------------------------------------------------------------------------------------------------------------------------------------------------------------------------------------------------------------------------------------------------------------------------------------------------------------------------------------------------------------------------------------------------------------------------------------------------------------------|
|                       | <ul style="list-style-type: none"> <li>• Medizinischen Hochschule Hannover</li> <li>• Universitätsmedizin der Otto-von-Guericke Universität Magdeburg</li> <li>• Universitätsmedizin der Johannes Gutenberg Universität Mainz</li> <li>• Universitätsklinikum der Westfälischen Wilhelms-Universität Münster</li> <li>• Universitätsklinikum Regensburg</li> <li>• Universitätsklinikum der Eberhard Karls Universität Tübingen</li> <li>• Universitätsklinikum Ulm</li> <li>• Universitätsklinikum Würzburg</li> </ul>                                                                                                          |
| Statistische Analysen | <p>Durchführung deskriptiver und univariater Statistiken; Durchführung multivariater Analyseverfahren zur Identifikation des Einflusses der NVF auf das Outcome. Statistische Auswertungen erfolgen durch das Institut für Klinische Epidemiologie und Biometrie der Universität Würzburg (Vorstand Prof. Heuschmann), dem Institut für Epidemiologie, Sozialmedizin und Gesundheitssystemforschung (Vorstand Prof. Walter), Medizinische Hochschule Hannover und dem Institut für Medizinische Psychologie, Universitätsklinikum Hamburg-Eppendorf (Prof. Bullinger). Details der statistischen Auswertung unter Punkt 8.2.</p> |
| Zeitplan              | <p>Zweiphasiger Projektablauf:</p> <p>(1) Versorgung der PatientInnen nur mit einem somatischen Lotsen („Regelversorgung“, Kontrollgruppe (KG)) in Phase I (Rekrutierung 12 Monate) - Beginn Oktober 2018; Nachverfolgung 12 Monate</p> <p>(2) Versorgung der PatientInnen durch einen zusätzlichen</p>                                                                                                                                                                                                                                                                                                                          |



|  |                                                                                                                                                                                                                       |
|--|-----------------------------------------------------------------------------------------------------------------------------------------------------------------------------------------------------------------------|
|  | psychiatrisch/psychosomatischer Facharzt <sup>1</sup> als Lotse („NVF“, Interventionsgruppe (IG)) in Phase II (Rekrutierung 16 Monate) – Beginn Oktober 2019; Nachverfolgung 12 Monate<br>Projektende: September 2022 |
|--|-----------------------------------------------------------------------------------------------------------------------------------------------------------------------------------------------------------------------|

---

<sup>1</sup> Aus Gründen der Lesbarkeit wird in diesem Bericht auf eine geschlechtliche Formulierung verzichtet. Selbstverständlich sind alle Personen gleichermaßen gemeint.

# 1. EINFÜHRUNG UND WISSENSCHAFTLICHE RATIONALE

## 1.1 Hintergrund

Das Nationale Aktionsbündnis für Menschen mit Seltene Erkrankungen sieht für die Versorgung der Betroffenen spezialisierte Zentren vor (1). Eine der wichtigsten Aufgaben dieser Zentren ist es, geeignete krankheitsübergreifende Strukturen und Abläufe zur Diagnosefindung bei Menschen mit unklarer Diagnose und Verdacht auf eine seltene Erkrankung vorzuhalten. Neben der fachübergreifenden, interdisziplinären Zusammenarbeit ist auch die inter-institutionelle Zusammenarbeit zur Zusammenführung der unterschiedlichen Expertise entscheidend für eine rasche und effektive Diagnosefindung.

Eine besondere Herausforderung stellen Anfragen von Menschen (Kinder und Erwachsene) mit komplexen Beschwerdebildern dar, bei denen eine Seltene Erkrankung als Ursache vermutet wird. Klinisch lässt sich bei diesen PatientInnen trotz eines hohen zeitlichen und personellen Aufwands, häufig kein einzelnes Leitsymptom bzw. kein Schlüsselbefund als diagnostischer Wegweiser identifizieren. Die Erfahrungen der Antragsteller zeigen, dass bei Menschen mit unklarer Diagnose, die sich in einem Zentrum für Seltene Erkrankungen (ZSE) vorstellen, ein hohes Maß an psychiatrisch-psychosomatischer (Co-)Morbidity besteht. Die damit verbundenen Symptome können die Zeichen einer seltenen Erkrankung verschleiern und so eine Diagnose und Behandlung erschweren bzw. verzögern. Umgekehrt können auch nicht-seltene somatische Erkrankungen zusammen mit einer psychiatrischen Erkrankung oder Somatisierungsstörung ein komplexes Beschwerdebild erzeugen, welches an eine seltene Erkrankung denken lässt. Nicht zuletzt können auch rein psychiatrisch-psychosomatische Krankheitsbilder wie eine seltene Erkrankung anmuten. Gerade Menschen mit einer psychiatrisch-psychosomatischen (Co-)Morbidity, die sich in einem ZSE vorstellen, haben oft Störungen der Annahme und Bewältigung einer solchen (Co-)Morbidity und nehmen daher meist die Angebote der Regelversorgung nicht an. Gelingt jedoch eine Vermittlung nicht, werden weitere Ärzte und Zentren (erfolglos) involviert, um die vermeintlich seltene somatische Erkrankung zu diagnostizieren.

Eine Auswertung aus der Ambulanz des ZESE Nordbayern am Universitätsklinikum Würzburg zeigt, dass bei ca. 90% der sich vorstellenden PatientInnen eine

psychiatrisch-psychosomatische (Begleit-)Problematik vorliegt. Bei 20% der PatientInnen wurde abschließend eine primär psychiatrisch-psychosomatische Erkrankung diagnostiziert. Bei mehr als der Hälfte der PatientInnen mit einer letztendlich nachgewiesenen seltenen Erkrankung lag eine psychiatrisch-psychosomatische Co-Morbidität vor. Systematische Untersuchungen bei Menschen mit einer etablierten Diagnose der seltenen Erkrankung Mukoviszidose belegen, dass die Prävalenz von Depression und Angststörungen ca. 2-3 Mal so hoch ist wie in der Normalbevölkerung (2).

### Verzögerung bis zur endgültigen Diagnosestellung

Menschen mit seltenen Erkrankungen berichten regelmäßig über jahrelange Verzögerungen bis zur Diagnosestellung. Eine Befragung von Betroffenen in Großbritannien beschreibt eine mittlere Zeit bis zur Diagnose von 4 Jahren (3). Mehr als die Hälfte gab an, zunächst eine falsche Diagnose erhalten zu haben. Oft wurden Betroffene zunächst fälschlicherweise als „Hypochonder“ beurteilt oder mit dem Label „psychische Ursache“ versehen, was die Diagnosefindung zusätzlich verzögerte (4).

Aktuell werden in Deutschland PatientInnen mit unklaren komplexen Beschwerdebildern, die meist unter unspezifischen Symptomen leiden, häufig vor Abschluss einer somatischen Diagnostik zu einem Psychiater bzw. Psychosomatiker verwiesen, was von den Betroffenen nicht nachvollzogen werden kann und zusätzlich als belastend empfunden wird. Die „klassische“ Versorgung in einem ZSE beginnt mit einer somatischen Abklärung. Wenn dort (zunächst) keine Diagnose gestellt werden kann, wird oft empfohlen, sich bei einem Psychiater oder Psychosomatiker vorzustellen. Dadurch wird die Suche nach einer seltenen Erkrankung im besten Fall nur ausgesetzt, oft aber auch beendet. Von Seiten der PatientInnen wird das Vorgehen als „Abschiebung“ empfunden. Sie nehmen das Angebot einer psychiatrisch-psychosomatischen Abklärung und Hilfe nicht an, sondern suchen in der Folge weitere Experten auf oder nehmen Kontakt zu weiteren ZSE auf, ohne dass eine abschließende Diagnosestellung erfolgt. Letztlich bleiben somit die endgültige Diagnose aber auch eine mögliche psychische Problematik unbehandelt und trägt zu erheblichen und überflüssigen Kosten im Gesundheitssystem bei.

## 1.2 Fragestellungen und Begründung der Studie

Es wird angenommen, dass die Präsenz eines psychiatrisch-psychosomatischen Lotsen auf allen Stufen der Abklärung bei PatientInnen mit Verdacht auf eine Seltene Erkrankung aber noch unklarer Diagnose den Weg zur endgültigen Diagnose verkürzen und die Wahrscheinlichkeit einer Diagnosefindung erhöhen kann. Durch die gleichzeitige Abklärung somatischer und psychiatrisch/psychosomatischer Beschwerden soll den PatientInnen das Gefühl von „fehlendem Verständnis“ und „Abschiebung“ genommen werden und die Akzeptanz für eine gegebenenfalls erforderliche psychiatrisch/psychosomatische Intervention erhöht werden.

Die Ziele der neuen Versorgungsform (NVF) sind daher

- 1) Erhöhung der diagnostischen Erfolgsquote
- 2) Verkürzung der Zeit bis zur Diagnosestellung
- 3) Steigerung der gesundheitsökonomischen Effizienz bei der Diagnosestellung incl. Optimierung des Ressourceneinsatzes bei hochqualifizierter innovativer Diagnostik
- 4) Erfolgreiche Überleitung der Betroffenen in die Regelversorgung nach Diagnosestellung zur Einleitung einer Therapie

Erläuterung:

Ziele 1 bis 3: durch eine strukturierte Diagnostik, die von Beginn an sowohl somatische als auch psychiatrisch-psychosomatische Expertise einschließt, kann der Weg zur Diagnose beschleunigt und effizienter gestaltet werden. Zudem sollen auch telemedizinische Verfahren zum Einsatz kommen. Die Zahl der gestellten Diagnosen (seltene oder nicht-seltene Erkrankungen mit oder ohne psychiatrisch-psychosomatische Co-Morbidität, rein psychiatrisch-psychosomatische Erkrankungen) kann durch den Einsatz dieser neuen Diagnostik gesteigert werden. Die Indikation für den Einsatz hochqualifizierter innovativer Diagnostikmethoden einschließlich „next generation sequencing“ (NGS) kann ressourcenschonend auf die Fälle beschränkt werden, wo eine höhere a-priori Wahrscheinlichkeit für einen Erfolg besteht.

Ziel 4: Die diagnostizierten PatientInnen können die für sie richtigen Therapieangebote wahrnehmen, womit Ressourcen zielgenau eingesetzt werden. Bei

psychosomatischer (Co-)Morbidity oder primär psychiatrisch-psychosomatischen Leiden kann durch die frühzeitige Einbindung des entsprechenden Experten sowie (telemedizinische) Sprechstunden die Motivation für eine entsprechende Therapie erhöht und eine Vermittlung in die Regelversorgung gebahnt werden. Durch eine persönliche und z.T. auch telemedizinische Betreuung kann ggf. in Akutsituationen die Phase bis zum Beginn einer Therapie im Rahmen der Regelversorgung verkürzt bzw. überbrückt werden.

### **1.3 Nutzen-Risiko-Abwägung**

Die Datenerhebung zur Evaluation der NVF ist mit keinem gesundheitlichen Risiko für die PatientInnen assoziiert.

## **2. STUDIENZIELE**

### **2.1 Primäre Hypothese**

Durch die NVF erhält ein höherer Anteil an PatientInnen eine sichere Diagnosestellung.

### **2.2 Sekundäre Hypothesen**

1. Die NVF verkürzt die (durchschnittliche) Zeitdauer bis zur Diagnosestellung von a) SE, b) psychiatrischen/psychosomatischen (psych.) und c) weiteren Erkrankungen sowie zum Ausschluss einer SE als Hauptdiagnose.
2. Die Überleitung aus dem ZSE in die Regelversorgung gelingt mit der neuen Versorgungsform häufiger.
3. Die NVF führt zu Einsparungen bei den Diagnosekosten und einem verbesserten inkrementellen Kosteneffektivitätsverhältnis im Vergleich zur Regelversorgung.
4. Geeignete Screening-Fragen können im klinischen Alltag zur Priorisierung von diagnostischen psychologischen Maßnahmen herangezogen werden.

5. Die NVF verbessert die Patientenzufriedenheit und die gesundheitsbezogene Lebensqualität.
6. Die NVF wird von den beteiligten Lotsen und Ärzten positiv wahrgenommen.

### **3. STUDIENDESIGN**

#### **3.1 ZSE-DUO: Konzept und Struktur**

Die Evaluation erfolgt als prospektive Kohortenstudie, die in zwei Phasen (jeweils zwölf Monate) abläuft. Es wird ein sequentieller Einschluss in die Kontrollgruppe (Phase I) und Interventionsgruppe (Phase II) durchgeführt. An den ZSE wird in Phase I zunächst in einem Zeitraum von 12 Monaten die Versorgung der PatientInnen nur mit einem somatischen Lotsen („Regelversorgung“, Kontrollgruppe (KG)) vorgesehen. In der anschließenden Folgeperiode (16 Monate; Phase II) wird zusätzlich ein psychiatrisch/psychosomatischer Facharzt als Lotse eingesetzt („NVF“, Interventionsgruppe (IG)). Dies gilt für die PatientInnen, die der Teilnahme an der Studie zugestimmt haben. Eine Verlängerung der Rekrutierungszeit von ursprünglich 9 auf 12 Monate in der KG und jetzt 16 Monate in der IG ist notwendig, um die gemäß Fallzahlplanung erforderliche Anzahl von Patienten zu erreichen.

Die PatientInnen, welche das ZSE in diesen beiden Zeiträumen erstmalig kontaktieren, werden prospektiv bezogen auf diagnostizierte SE, psychische und weitere Diagnosen sowie die weiteren definierten Endpunkte miteinander verglichen. An den elf ZSEs werden in 28 Monaten insgesamt ca. 4.000 kontaktierende PatientInnen auf der Suche nach einer Diagnose erwartet. Konservativ geschätzt qualifizieren sich davon jeweils mindestens 825 dieser PatientInnen für die Regelversorgung (KG) bzw. die NVF (IG) nach den Ein- und Ausschlusskriterien des Projekts. Basierend auf den Erfahrungen von früheren Studien wird angenommen, dass von diesen PatientInnen ca. 85 % zur Teilnahme an der Evaluation bereit sein werden.

#### **3.2 Förderung**

Das Projekt erhält eine Förderung aus Mitteln des Innovationsfonds zur Förderung von neuen Versorgungsformen (§ 92a Abs. 1 SGB V) für das Projekt: „ZSE-DUO – Duale Lotsenstruktur zur Abklärung unklarer Diagnosen in Zentren für Seltene Erkrankungen“ - Förderkennzeichen: 01NVF17031.

### **3.3 Art der Datenerfassung**

Es sollen alle PatientInnen eingeschlossen werden, die im Projektzeitraum ein ZSE erstmalig kontaktieren und bislang keine Diagnose für ihr Erkrankungs- und Beschwerdebild erhalten haben. Mit Hilfe des Auszuges von Informationen aus der Falldokumentation und Patientenfragebögen zum Zeitpunkt des Erstkontaktes sowie 12 Monate später, sollen Daten zu soziodemographischen Einflussfaktoren, Lebensqualität, Gesundheitszustand, Krankheitsgeschichte, Leistungsanspruchnahme, somatischen sowie psychischen Symptomen erhoben werden. Außerdem sollen bei einem kleinen Teil der StudienteilnehmerInnen qualitative Befragungen zur NVF telefonisch durchgeführt werden. Zudem werden bei ausgewählten PatientInnen (Versicherte der Techniker Krankenkasse, IKK gesund plus und der kooperierenden Krankenkasse AOK Hessen) Routinedaten für Sekundäranalysen, insbesondere gesundheitsökonomische Analysen verwendet.

### 3.4 Zeitplan

|                                                             | Vorbereitungsphase |    |    |    | Projektlaufzeit |    |    |    |      |    |    |    |      |    |    |    |      |    |    |    |    |    |  |  |  |  |  |  |
|-------------------------------------------------------------|--------------------|----|----|----|-----------------|----|----|----|------|----|----|----|------|----|----|----|------|----|----|----|----|----|--|--|--|--|--|--|
|                                                             | 2018               |    |    |    | 2019            |    |    |    | 2020 |    |    |    | 2021 |    |    |    | 2022 |    |    |    |    |    |  |  |  |  |  |  |
|                                                             | Q2                 | Q3 | Q4 | Q1 | Q2              | Q3 | Q4 | Q1 | Q2   | Q3 | Q4 | Q1 | Q2   | Q3 | Q4 | Q1 | Q2   | Q3 | Q4 | Q1 | Q2 | Q3 |  |  |  |  |  |  |
| <b>Vorbereitung</b>                                         |                    |    |    |    |                 |    |    |    |      |    |    |    |      |    |    |    |      |    |    |    |    |    |  |  |  |  |  |  |
| Finalisierung Studienprotokoll                              |                    |    |    |    |                 |    |    |    |      |    |    |    |      |    |    |    |      |    |    |    |    |    |  |  |  |  |  |  |
| Patienten-Informationsmaterial                              |                    |    |    |    |                 |    |    |    |      |    |    |    |      |    |    |    |      |    |    |    |    |    |  |  |  |  |  |  |
| Einwilligungserklärungen                                    |                    |    |    |    |                 |    |    |    |      |    |    |    |      |    |    |    |      |    |    |    |    |    |  |  |  |  |  |  |
| Fragebögen                                                  |                    |    |    |    |                 |    |    |    |      |    |    |    |      |    |    |    |      |    |    |    |    |    |  |  |  |  |  |  |
| Ethik-Voten in allen Zentren                                |                    |    |    |    |                 |    |    |    |      |    |    |    |      |    |    |    |      |    |    |    |    |    |  |  |  |  |  |  |
| Leitfäden für Mitarbeiter                                   |                    |    |    |    |                 |    |    |    |      |    |    |    |      |    |    |    |      |    |    |    |    |    |  |  |  |  |  |  |
| Verträge mit den Partnern                                   |                    |    |    |    |                 |    |    |    |      |    |    |    |      |    |    |    |      |    |    |    |    |    |  |  |  |  |  |  |
| <b>Förderperiode</b>                                        |                    |    |    |    |                 |    |    |    |      |    |    |    |      |    |    |    |      |    |    |    |    |    |  |  |  |  |  |  |
| <b>Projektorganisation und Durchführung</b>                 |                    |    |    |    |                 |    |    |    |      |    |    |    |      |    |    |    |      |    |    |    |    |    |  |  |  |  |  |  |
| Einstellung fachärztl. Koordinatoren                        |                    |    |    |    |                 |    |    |    |      |    |    |    |      |    |    |    |      |    |    |    |    |    |  |  |  |  |  |  |
| Einstellung Koordinationsassistenten                        |                    |    |    |    |                 |    |    |    |      |    |    |    |      |    |    |    |      |    |    |    |    |    |  |  |  |  |  |  |
| Einstellung psychiatr.-psychosomat. Lotsen                  |                    |    |    |    |                 |    |    |    |      |    |    |    |      |    |    |    |      |    |    |    |    |    |  |  |  |  |  |  |
| Rekrutierung Standardversorgung (KG)                        |                    |    |    |    |                 |    |    |    |      |    |    |    |      |    |    |    |      |    |    |    |    |    |  |  |  |  |  |  |
| Behandlung Standardversorgung (KG)                          |                    |    |    |    |                 |    |    |    |      |    |    |    |      |    |    |    |      |    |    |    |    |    |  |  |  |  |  |  |
| Rekrutierung „NVF“ (IG)                                     |                    |    |    |    |                 |    |    |    |      |    |    |    |      |    |    |    |      |    |    |    |    |    |  |  |  |  |  |  |
| Behandlung „NVF“ (IG)                                       |                    |    |    |    |                 |    |    |    |      |    |    |    |      |    |    |    |      |    |    |    |    |    |  |  |  |  |  |  |
| Treffen Steuerungsgruppe                                    |                    |    |    |    |                 |    |    |    |      |    |    |    |      |    |    |    |      |    |    |    |    |    |  |  |  |  |  |  |
| Telefon- / Videokonferenzen bzw. Treffen der Arbeitsgruppen |                    |    |    |    |                 |    |    |    |      |    |    |    |      |    |    |    |      |    |    |    |    |    |  |  |  |  |  |  |
| B. Bed. Nachsteuerung                                       |                    |    |    |    |                 |    |    |    |      |    |    |    |      |    |    |    |      |    |    |    |    |    |  |  |  |  |  |  |
| <b>Evaluation</b>                                           |                    |    |    |    |                 |    |    |    |      |    |    |    |      |    |    |    |      |    |    |    |    |    |  |  |  |  |  |  |
| Vorbereitung IT & Datenaufbereitung                         |                    |    |    |    |                 |    |    |    |      |    |    |    |      |    |    |    |      |    |    |    |    |    |  |  |  |  |  |  |
| Abstimmung Fragebögen                                       |                    |    |    |    |                 |    |    |    |      |    |    |    |      |    |    |    |      |    |    |    |    |    |  |  |  |  |  |  |
| Zentrale Datenbank                                          |                    |    |    |    |                 |    |    |    |      |    |    |    |      |    |    |    |      |    |    |    |    |    |  |  |  |  |  |  |
| Ärztbefragung                                               |                    |    |    |    |                 |    |    |    |      |    |    |    |      |    |    |    |      |    |    |    |    |    |  |  |  |  |  |  |
| Erfass. Patientenerwartung (KG & IG)                        |                    |    |    |    |                 |    |    |    |      |    |    |    |      |    |    |    |      |    |    |    |    |    |  |  |  |  |  |  |
| Erfassung Patientenzufriedenheit (KG & IG)                  |                    |    |    |    |                 |    |    |    |      |    |    |    |      |    |    |    |      |    |    |    |    |    |  |  |  |  |  |  |
| Finalisierung Datenbank                                     |                    |    |    |    |                 |    |    |    |      |    |    |    |      |    |    |    |      |    |    |    |    |    |  |  |  |  |  |  |
| Prädiktiver Wert Screeninginstrumente                       |                    |    |    |    |                 |    |    |    |      |    |    |    |      |    |    |    |      |    |    |    |    |    |  |  |  |  |  |  |
| Abschlussvaluation Primäres Outcome                         |                    |    |    |    |                 |    |    |    |      |    |    |    |      |    |    |    |      |    |    |    |    |    |  |  |  |  |  |  |
| Evaluation Sekundäre Outcomes                               |                    |    |    |    |                 |    |    |    |      |    |    |    |      |    |    |    |      |    |    |    |    |    |  |  |  |  |  |  |
| Zwischenevaluationen Interventionsgruppe                    |                    |    |    |    |                 |    |    |    |      |    |    |    |      |    |    |    |      |    |    |    |    |    |  |  |  |  |  |  |
| Datenauswertung Patientenerwartung / Zufriedenheit          |                    |    |    |    |                 |    |    |    |      |    |    |    |      |    |    |    |      |    |    |    |    |    |  |  |  |  |  |  |
| Erstellung Publikationen                                    |                    |    |    |    |                 |    |    |    |      |    |    |    |      |    |    |    |      |    |    |    |    |    |  |  |  |  |  |  |





Der Beginn der ZSE-DUO Evaluation ist nach Abschluss aller vertraglichen Vereinbarungen und nach Etablierung der nötigen Infrastruktur im Oktober 2018 mit der Rekrutierung der Kontrollgruppe (Standardversorgung) geplant. Die Dauer der Rekrutierung ist auf 28 Monate (12 Monate Kontrollgruppe + 16 Monate Interventionsgruppe) festgelegt. Jeder Studienteilnehmer soll 12 Monate nach der Rekrutierung (Datum der Einwilligung zur Teilnahme am Projekt) einmalig postalisch nachbefragt werden.

## **4. STUDIENPOPULATION**

### **4.1 Vorgehen zur Patientenauswahl**

Es werden insgesamt 1364 PatientInnen, die eines der 11 teilnehmenden ZSE erstmalig kontaktieren und einer Studienteilnahme zustimmen, konsekutiv in die Studie eingeschlossen. Aufgrund der verschiedenartigen Anfragesituation in den einzelnen Zentren wird eine unterschiedliche Zahl an rekrutierten Patienten je ZSE zu Grunde gelegt. Entsprechend der lokalen Anfragen und Kapazitäten werden die auf die Standorte angepassten Fallzahlen (insgesamt 682 in der Kontroll- sowie in der Interventionsgruppe) innerhalb eines 28-monatigen Zeitraums angestrebt. Die Fallzahlen von Kontroll- und Interventionsgruppe können zwischen und innerhalb eines Zentrums variieren.

## 4.2 Einschlusskriterien

Konsekutiv behandelte PatientInnen, die folgende Einschlusskriterien erfüllen:

- erstmalige Kontaktierung eines ZSE im Projektzeitraum
- keine gesicherte Diagnose und Verdacht auf eine seltene Erkrankung
- ambulante Vorstellung nach Sichtung der Unterlagen an einem regionalen ZSE
- Vorliegen eines schriftlichen Einverständnisses zur Teilnahme an die Studie

## 4.3 Ausschlusskriterien

- Alter < 12 Jahre
- inkomplette Unterlagen (Fragebogen, Überweisung durch Haus- oder Facharzt, Epikrise des betreuenden Arztes)
- bereits vordiagnostizierte Seltene Erkrankung oder vordiagnostizierte nicht-seltene Erkrankung oder vordiagnostizierte psychiatrisch-psychosomatische Erkrankung, die die Symptomatik erklärt
- fehlendes schriftliches Einverständnis

# 5. STUDIENABLAUF

## 5.1 Rekrutierung

Die Rekrutierung für das Projekt erfolgt konsekutiv in den beteiligten elf Zentren für Seltene Erkrankungen der Universitätsklinika Aachen, Bochum, Frankfurt, Hannover, Magdeburg, Mainz, Münster, Regensburg, Tübingen, Ulm und Würzburg. Es werden die eingereichten Unterlagen in den Zentren geprüft und die Eignung für die Studie durch das lokale Projektteam festgelegt.

Die PatientInnen werden vor der Vorstellung in einem der teilnehmenden Zentren telefonisch und schriftlich über das Projekt informiert. Bei der ersten Vorstellung im Zentrum werden sie um ihre Teilnahme an der Studie gebeten.

### Screening-Log

In den beteiligten ZSEs wird ein digitales Screening-Log geführt, in dem anonym alle PatientInnen erfasst werden, die die Einschlusskriterien erfüllen. Nur von den PatientInnen, die der Teilnahme am Projekt ZSE-DUO zustimmen, werden im Log nach schriftlicher Einwilligung zur Studienteilnahme noch Name, Geburtsdatum, Adresse, Telefonnummer, und von ausgewählten Teilnehmern bei separater Einwilligung bei den Versicherten der kooperierenden Krankenkassen (Techniker Krankenkasse, IKK gesund plus, AOK Hessen), die dafür gesondert eingewilligt haben, die Krankenkassennummer vermerkt.

Im Screening-Log wird der Grund der Nicht-Teilnahme als Freitext notiert, beispielweise „aus logistischen Gründen“ (z.B. Umzug) oder „möchte nicht teilnehmen“. Zudem wird für eine Auswertung zur Abschätzung eines möglichen Bias durch diese nicht-rekrutierbaren PatientInnen bei dieser Gruppe Alter und Geschlecht sowie Dauer der Erkrankungen erhoben.

#### *Basisdaten der ZSE*

Um mögliche Änderungen in der Versorgungsqualität während der Studie zu erkennen, die nicht auf den zusätzlichen fachärztlichen psychiatrisch-psycho somatischen Lotsen zurückzuführen sind, soll der Zeitraum zwischen Einreichung aller nach Erstanmeldung angeforderten Unterlagen und der persönlichen Erstvorstellung im Zentrum zwischen der Kontrollgruppe und der Interventionsgruppe verglichen werden.

Um zu prüfen, ob der Behandlungsprozess unter den Bedingungen der Regelversorgung auch während der Behandlung der Kontrollgruppe gleichgeblieben ist, werden retrospektiv Daten zur Behandlung der PatientInnen aus den 9 Monaten vor Beginn der Studie (Anzahl Diagnosestellung, Dauer bis zur Diagnosestellung) ausgewertet und mit den Daten der Kontrollgruppe verglichen. Diese Angaben werden von den Zentren anonymisiert ggf. bei zu geringer Zellbesetzung aggregiert bereitgestellt, bei denen vor Beginn der Studie keine größeren Umstrukturierungen im Ablauf vorgenommen werden.

## 5.2 Patientenaufklärung und -einwilligung

Die PatientInnen werden vom Studienarzt/-ärztin oder Projektmitarbeiter/in ausführlich über den Inhalt und Zweck der Studie ZSE-DUO, den Ablauf der Befragungen und Datenerhebung sowie das Datenschutzkonzept der Studie aufgeklärt. Auch wird Ihnen mitgeteilt, dass eine telefonische und/oder postalische Befragung 12 Monate nach Einschluss in die Studie geplant ist. Des Weiteren wird der/die Patient/in – wenn er bei einer der am Projekt als Konsortial- oder Kooperationspartner beteiligten Krankenkassen versichert ist – gefragt, ob ein Projektmitarbeiter des jeweiligen betreuenden Zentrums die Krankenkasse der/s Patient/in kontaktieren darf, damit über die Krankenkasse Angaben aus den Abrechnungsdaten zu 1 Jahr vor Studieneinschluss bis 1 Jahr nach Studieneinschluss der Behandlung am ZSE erfolgten ambulanten und stationären Behandlungen, Rehabilitationsleistungen, Arznei-, Heil- und Hilfsmittel sowie Zeiten der Erwerbs- und Arbeitsunfähigkeit in pseudonymisierter Form (d.h. mittels einer Patientenidentifikationsnummer verschlüsselt) zur Verfügung gestellt werden. Die Angaben werden mit den weiteren erhobenen Daten verbunden und gespeichert.

Die PatientInnen werden darauf aufmerksam gemacht, dass bei besonders komplexen Krankheitsbildern zentrenübergreifende Fallkonferenzen vorgesehen sind. Tritt dieser Fall ein, wird der/die PatientIn gesondert um Entbindung seiner/ihrer behandelnden Ärzte von der Schweigepflicht gebeten.

Außerdem werden alle in die Studie eingeschlossenen PatientInnen um Ihre Einwilligung dazu gebeten, dass im Zuge der Nachbefragung, bei postalischem oder telefonischem Nichterreichen ggf. das Einwohnermeldeamt nach dem Verbleib befragt werden darf.

Es wird auf die Freiwilligkeit, das jederzeitige Widerrufsrecht sowie die datenschutzrechtlichen Rechte (DSGVO) hingewiesen.

Es wird jedem Patienten bereits vor der Vorstellung am ZSE die Patienteninformation (siehe Anhang 13.1.) zugeschickt, nachdem er telefonisch durch die Ärzte am Zentrum über das Projekt informiert wurde. Bei Vorstellung erfolgt dann eine ärztliche

Aufklärung. Anschließend wird der/die Patient/in nach angemessener Bedenkzeit um die Einwilligung für die Teilnahme an der Evaluation ZSE-DUO gebeten. Eine Ablehnung führt zu keinerlei Nachteilen für die PatientInnen. Die PatientInnen bekommen eine Kopie der Einwilligungserklärung ausgehändigt. Das Original verbleibt am beteiligten Zentrum für Seltene Erkrankungen.

Ist der Patient noch keine 18 Jahre alt, gibt es die Möglichkeit der Einwilligung zur Studienteilnahme durch eine erziehungsberechtigte Person. Jugendliche, die vor Abschluss der Datenerhebung die Volljährigkeit erlangen, werden erneut kontaktiert und um eine Einwilligung zum Verbleib in der Studie gebeten. Wird die Einwilligung der Erziehungsberechtigten dabei nicht erneuert, werden die personenidentifizierenden Daten gelöscht und die Studiendaten anonymisiert.

Bei Patienten, die aufgrund Ihrer gesundheitlichen oder psychischen Situation nicht für sich selbst entscheiden können, besteht die Möglichkeit einer Einwilligung zur Studienteilnahme durch eine gesetzlich bestellte Betreuung.

### **5.3 Datenerhebung zu Studienbeginn**

Die Daten über somatische und psychische Symptome sowie die Krankheitsgeschichte werden in standardisierter Form erfasst. Dazu werden auf der einen Seite Daten vom behandelnden Arzt oder Mitgliedern des Studienteams auf der anderen Seite von den PatientInnen selbst mittels Fragebogen erfragt und direkt in den Zentren als eCRFs ausgefüllt.

#### Inhalte des Patienten-Fragebogen

Die/der PatientIn wird bei Projekteinschluss zu folgenden Bereichen befragt:

- Sozio-Demographie (z. B. Familienstand, Schulabschluss, Wohnsituation)
- Körperliche Beschwerden und Symptome
- Lebensqualität
- Psychologische Situation (z. B. Dissoziative Störungen, Angsterkrankungen, Depression)

- Aktueller Stand der Berufstätigkeit, ggf. Pflegegrad, ggf. anerkannter Behindertenstatus

Die folgenden standardisierten Instrumente sind Teil des Patienten-Fragebogens:

- EQ-5D
- SF-12
- PHQ-15
- GAD-7
- DSS-4
- SCL-K-9
- KIDSCREEN-10 (bei Jugendlichen)
- SDQ (bei Jugendlichen)

Unter der Verantwortlichkeit des Center for Health Economics and Research Hannover (CHERH), Medizinische Hochschule Hannover) werden in einem standardisierten Fragebogen

- Bisheriger Diagnoseweg (z. B. konsultierte Fachärzte, Untersuchungen)
- Bisherige Therapie (z.B. Medikamente, Ergotherapie, Physiotherapie, Rehabilitationsmaßnahmen)
- Phasen der Arbeitsunfähigkeit in den vergangenen 12 Monaten
- Änderung der beruflichen Situation

erfragt.

Der unter der Verantwortlichkeit des Center for Health Economics and Research Hannover (CHERH), Medizinische Hochschule Hannover, eingesetzte standardisierte Fragebogen soll mit Hilfe einer Pilotstudie am Zentrum für Seltene Erkrankungen der Medizinischen Hochschule Hannover geprüft werden.

### Inhalte des Arzt-Fragebogen

Der Arzt wird bei Einschluss eines/er PatientIn in das Projekt zu folgenden Bereichen befragt:

- Somatische Symptome

- Psychiatrisch-Psychosomatische Symptome (nur Interventionsgruppe)
- Krankheitsgeschichte (Arztkontakte)
- Medikamentenanamnese
- Mehrwert von Fragebögen zur mentalen Gesundheit (nur Interventionsgruppe)

## **5.4 Kontaktaufnahme und Befragung zum Follow-up**

### Follow-up nach 12 Monaten

Für das Follow-up nach 12 Monaten werden die PatientInnen, postalisch und/oder telefonisch durch das behandelnde Zentrum für Seltene Erkrankungen nachbefragt. Auf dem Postweg wird den PatientInnen ein Fragebogen zugesandt; wenn eine/ein PatientIn per Post nicht kontaktiert werden kann, werden standardisierte Prozesse angewandt, um ein Telefon-Interview mit dem/r Patienten/In oder dessen gesetzlichem Vertreter durchzuführen.

Auch die Ärzte im behandelnden ZSE werden zu jedem/r teilnehmende/n PatientIn nach 12 Monaten nochmals befragt.

### Inhalte der 12-Monats-Nachbefragung (PatientIn)

Um die Primär- und Sekundärhypothesen untersuchen zu können, werden die PatientInnen sowie der behandelnde Arzt/Lotse nach 12 Monaten nachbefragt. Inhalte der Nachbefragung beziehen sich auf

- Zeitpunkt Diagnosestellung
- Behandlungsverlauf, inkl. Terminwahrnehmung in Regelversorgung
- Lebensqualität (SF-12, EQ-5D)
- Zufriedenheit ZUF 8
- PHQ-9
- GAD-7
- KIDSCREEN-10 (bei Jugendlichen)
- SDQ (bei Jugendlichen)



Unter der Verantwortlichkeit des Center for Health Economics and Research Hannover (CHERH), Medizinische Hochschule Hannover) werden in einem standardisierten Fragebogen

- Bisheriger Diagnoseweg (z. B. konsultierte Fachärzte, Untersuchungen)
- Bisherige Therapie (z.B. Ergotherapie, Physiotherapie, Rehabilitationsmaßnahmen)
- Phasen der Arbeitsunfähigkeit in den vergangenen 12 Monaten
- Änderung der beruflichen Situation
- Leistungsanspruchnahme (Arztkontakte, Untersuchungen, Medikamente)

erfragt.

#### Inhalte der 12-Monats-Nachbefragung (Arzt)

Der behandelnde Arzt/Lotse wird nach 12 Monaten nachbefragt. Inhalte der Nachbefragung beziehen sich auf das Behandlungsergebnis der PatientInnen

- Zeitpunkt Diagnosestellung
- Diagnosecode
- Anzahl Besuch/persönliche Einbestellungen ins ZSE
- Anzahl Telemedizinischer Sprechstunden
- Anzahl der Fallkonferenzen, standort-intern und zentrumsübergreifend
- Überführung in die Regelversorgung
- Arztkontakte
- Medikamenteneinnahme
- Mehrwert von Fragebögen zur mentalen Gesundheit (nur Interventionsgruppe)

Durch das Center for Health Economics and Research Hannover (CHERH), Medizinische Hochschule Hannover) wird zusätzlich erhoben:

- Durchgeführte Diagnostik/Leistungen
- Personalmittel
- Sachmittel (z. B. Verbrauchsmaterial)

#### Ablauf der Nachbefragung (PatientIn)

Den Teilnehmer/innen der Studie wird ca. 12 Monaten nach der Erstvorstellung in einem Zentrum für Seltene Erkrankungen, ein standardisierter Fragebogen

zugesendet. Sollte der/die PatientIn innerhalb von zwei Wochen nicht antworten, wird sie/er durch speziell geschultes Studienpersonal (wissenschaftliche Mitarbeiter, Doktoranden, studentische Mitarbeiter) der jeweilig behandelnden Einrichtung telefonisch nachbefragt. Sollte der/die PatientIn telefonisch nicht erreichbar sein, wird das Einwohnermeldeamt kontaktiert.

#### Ablauf der Nachbefragung (Arzt)

Im behandelnden Zentrum werden standardisierte Fragebögen, auch als eCRF, nach 12 Monaten nach Erstvorstellung des/r Patienten/In ausgefüllt.

Der Ressourcenaufwand (durchgeführte Diagnostik/Leistungen, Personalmittel, Sachmittel (z. B. Verbrauchsmaterial)) wird mittels Beobachtung und Befragung in Stations-Visiten erhoben. Aufbauend auf der Prozessanalyse wird der gesamte durchschnittliche Ressourcenverbrauch erfasst und ökonomisch bewertet. Die monetäre Bewertung der Leistungen folgt gängigen Bewertungssätzen. Zudem werden für die Diagnosekosten Daten aus der Dokumentation der ZSEs (z.B. Prozessschritte der fachärztl. Koordinatoren und psychiatr.-psychosomat. Lotsen) verwendet.

## **6. PATIENTENSICHERHEIT**

Die Beantwortung der Fragebögen sowie die standardisierte Nachbefragung der PatientInnen gehen mit keinerlei Risiko für die Studienteilnehmer einher.

### **6.1 Unerwünschte Ereignisse (AE) / schwerwiegende unerwünschte Ereignisse (SAE)**

Da in der neuen Versorgungsform keine neuen Behandlungsformen eingeführt, sondern lediglich Abläufe verändert werden und die PatientInnen im Rahmen der Evaluation ausschließlich darum gebeten werden, Fragebögen auszufüllen, ist mit keinen studienspezifischen AE/ SAE zu rechnen.

## 7. DATENVERARBEITUNG UND DATENSCHUTZ

### 7.1 Datenmanagement und Datenschutz

Alle erhobenen Daten der PatientInnen werden durch die Vergabe einer eindeutigen Identifikationsnummer pseudonymisiert ("Patienten-ID"). Die Pseudonymisierung findet „hands on“ über ein Screenlog statt, das auf einen passwort-geschützten Server des Universitätsklinikums Würzburg gehostet wird.

Das Passwort entspricht der Password-Policy des Universitätsklinikums Würzburg und wird den einzelnen Zentren personenbezogen mitgeteilt.

Personenidentifizierende Daten werden ausschließlich in den rekrutierenden Zentren gespeichert. Die Kontaktaufnahme zu den Follow-Ups erfolgt ausschließlich durch mit dem Projekt befasste Mitarbeiter der betreuenden ZSEs, die entweder der ärztlichen Schweigepflicht unterliegen und/oder verpflichtet sind, das Datengeheimnis gemäß §5 BDSG sowie regionaler Gesetze zu wahren.

Die konkrete Ausgestaltung der zu ergreifenden Maßnahmen folgt den Vorgaben der Datenschutzbeauftragten der jeweiligen Zentren. Eine datenschutzrechtliche Freigabe des behördlichen Datenschutzers der Universität Würzburg (**DS-117.605-12/18**) sowie des Datenschutzers der Medizinischen Hochschule Hannover liegen vor.

Sowohl die eingesetzten CRFs als auch die Krankenkassendaten sind nur durch eine eindeutigen Identifikationsnummer einem Patient zugeordnet. Eine Zusammenspielen der erhobenen Daten eines/r PatientIn erfolgt nur über das Pseudonym. Die CRFs werden mit der Scan Software TeleForm® erstellt. Die CRFs können lediglich durch die Datenmanager in TeleForm® verändert werden.

#### Bestandteil Behandlungskonzept

Im Rahmen der klinischen Versorgung in Würzburg werden die für das Universitätsklinikum Würzburg festgelegten Verfahrensweisen genutzt (siehe Rahmendatenschutzkonzept des Universitätsklinikums Würzburg vom 13.03.2018). Die telemedizinischen Sprechstunden werden mit der Software Skype for Business realisiert (Datenschutzfreigabe vom 19.11.2015 des behördlichen Datenschutzbeauftragten des Universitätsklinikums Würzburg). Dieses System wird auch für zentrumsübergreifende Fallkonferenzen genutzt. Für dieses Verfahren liegen neben der Datenschutzfreigabe auch entsprechende Einwilligungserklärungen vor (siehe

Anlagen), in der auch eine Entbindung des behandelnden Arztes von der Schweigepflicht enthalten ist. Für das Einholen von zentrumsübergreifenden schriftlichen Konsilen wird die Software der Firma OpenApp (Irland) genutzt werden, die auch bei den Europäischen Referenznetzwerken Anwendung findet. Für diese Software gibt es eine Freigabe durch den Data Protection Officer der Europäischen Kommission. Für die Nutzung in Würzburg wird eine Version der Software in Würzburg auf Servern des Universitätsklinikums Würzburg gehostet. Nach Installation und vor Nutzung wird eine Datenschutzfreigabe beantragt. Auch wird eine entsprechende Information und Einwilligung in die Verwendung der pseudonymisierten Daten von den PatientInnen eingeholt werden, die sich an den entsprechenden Bögen der Europäischen Referenznetzwerke orientiert (wird nachgereicht).

## **7.2 Quelldaten und -material**

Einträge in Patientenakten werden als Quelldaten verwendet. Nach Zustimmung zur Teilnahme an dem Register werden die oben beschriebenen Daten in den jeweiligen lokalen Studienzentren aus den Patientenakten extrahiert und durch die behandelnden Ärzte in ein elektronisches CRF eingetragen. Alle eCRFs werden durch Vergabe einer eindeutigen Identifikationsnummer pseudonymisiert. Die Zuordnung der Klarnamen zu den entsprechenden Pseudonymen erfolgt in den Einrichtungen, wie oben beschrieben, auf einer separaten Liste, die getrennt von den pseudonymisierten klinischen Daten gespeichert wird.

## **7.3 Papierbasierte CRFs**

Die Nachbefragung erfolgt durch die rekrutierenden Zentren, die erhobenen Daten werden – nur durch das Patienten-eindeutige Pseudonym identifizierbar – mittels papierbasiertem CRF an das Institut für Klinische Epidemiologie und Biometrie (IKE-B) der Universität Würzburg weitergeleitet.

Dort erfolgt eine weitere automatisierte Verarbeitung der Daten mittels der Software Teleform.

Die Nachbefragung wird vom Institut für Klinische Epidemiologie und Biometrie, Universität Würzburg koordiniert, aber dezentral durch die teilnehmenden Zentren für seltene Erkrankungen durchgeführt.

Die Zuordnung der Nachbefragung zu der Ausgangserhebung erfolgt über die vergebenen Pseudonyme. Die Angaben der Nachbefragung werden nur in pseudonymisierter Form erfasst und gespeichert.

Die CRFs werden bis zur Eingabe in die zentrale Datenbank und Beantwortung von Queries verschlossen im IKE-B gelagert und nach Eingabe datenschutzkonform vernichtet.

Während der Eingabe und Validierung der Fragebögen im Teleformsystem wird zur langfristigen Archivierung der Unterlagen von jedem Fragebogen ein PDF Dokument erzeugt, diese Dokumente werden unter dem jeweiligen Pseudonym auf einem zugriffsgeschützten Ordner auf einem Netzlaufwerk des SMI gesichert.

#### Patientenbefragung zur Gesundheitsökonomie

Das Center for Health Economics and Research Hannover (CHERH), Medizinische Hochschule Hannover) setzt zu Studienbeginn und im 12-Monats-Follow-up einem standardisierten Fragebogen ein. Die Zuordnung zur der zentralen Datenerhebung erfolgt über die vergebenen Pseudonyme. Die Angaben der Befragung werden nur in pseudonymisierter Form durch das Center for Health Economics and Research Hannover (CHERH), Medizinische Hochschule Hannover) erfasst und gespeichert.

#### **7.4 eCRF**

Eine elektronische Datenübertragung aus den behandelnden Einrichtungen ist mittels eCRF vorgesehen, so dass die Angaben zur Routinebehandlung in ein entsprechendes Formular am PC bzw. an einem Tablet eingeben werden können. Dies betrifft die Befragung der PatientInnen zur Baseline und die Befragung der Ärzte zu Baseline und Follow-up. Die Formulare liegen dabei direkt auf dem Server des Servicezentrums Medizininformatik (SMI) des Universitätsklinikums Würzburg und werden sicher in die Hauptdatenbank übertragen und gespeichert. Der Verschlüsselungsalgorithmus entspricht der Sicherheitsarchitektur für IT-Systeme. Eine Absicherung des Versands der pseudonymisierten klinischen Daten erfolgt durch SSL-Verbindungen, um die Unversehrtheit der übertragenen Daten sicherzustellen.

Die patientenbezogenen Fragebögen enthalten keine Angaben, die Rückschlüsse auf die Person zulassen. Die Patienten-ID wird zusammen mit der Klinik-ID als

Zahlenkombination in das eCRF eingetragen. Die weitergeleiteten Daten sind für die datenverarbeitende Stelle nur pseudonymisiert verfügbar.

## **7.5 Erhebungen und Datenbankauszüge von Externa (Untergruppen von Patienten)**

### Telefoninterviews

Ein Anteil von 10% der in die Studie eingeschlossenen PatientInnen wird zu Beginn des Projekts durch Projektmitarbeiter des Instituts für Medizinische Psychologie, Universitätsklinikum Hamburg-Eppendorf telefonisch zu ihren Erwartungen an die Behandlung und Lebensqualität befragt und nach 12 Monaten zu ihrer Zufriedenheit mit der Behandlung und Lebensqualität. Die Befragungen werden jeweils 30-45 Minuten dauern. Das „Baseline“ Interview (Erwartung) wird anhand eines strukturierten Interviewleitfadens geführt, das neben offenen Fragen zum Befinden und den Erwartungen an die Behandlung im ZSE validierte Instrumente zur Erfassung der Lebensqualität (SF-8) und zur psychosozialen Belastung (Distress-Thermometer inkl. Problemliste) nutzt. Das „Post“ Interview (Behandlungszufriedenheit) enthält zusätzlich den Lübecker Fragebogen-Doppelkarte (5 irrelevante Items wurden entfernt) sowie offenen Fragen zur Behandlungszufriedenheit.

### Erfassung der Zufriedenheit mit NVF von Ärzten und Lotsen

Die Untersuchungen erfolgen mittels Fokusgruppen und einer schriftlichen Befragung der in die NVF eingebundenen Ärzte und Lotsen.

### Abfrage der Daten der Krankenkassen

Des Weiteren sollen Routinedaten von PatientInnen der beteiligten Krankenkassen (Techniker Krankenkasse, IKK gesund plus, weitere kooperierende Kassen wie die AOK Hessen), die ihre Zustimmung hierfür gegeben haben, zu umfassenden ambulanten sowie stationären Behandlungen, Rehabilitationsleistungen, Arznei-, Heil- und Hilfsmittel sowie Zeiten der Arbeitsunfähigkeit auf Einzelleistungsebene in Sekundäranalysen ausgewertet werden. Als Grundlage wird hierfür ein

standardisierter Fragebogen zur Abfrage relevanter Informationen erarbeitet (s. Anhang).

Qualitative Untersuchung zur Zufriedenheit der Patienten und der Ärzte und Lotsen  
(Institut für Medizinische Psychologie, Universitätsklinikum Hamburg-Eppendorf / Center for Health Economics and Research Hannover (CHERH), Medizinischen Hochschule Hannover, Institut für Epidemiologie, Sozialmedizin und Gesundheitssystemforschung)

### Patientenzufriedenheit

Die im Rahmen des Forschungsvorhabens nach Einwilligungserklärung des Studienteilnehmers erhobenen persönlichen Daten unterliegen der Schweigepflicht und den datenschutzgesetzlichen Bestimmungen. Die Bereitschaft zur Teilnahme an den Telefoninterviews – zusätzlich zur Beantwortung der Fragebögen - ist in der Einverständniserklärung vermerkt. In die Patienteninformation und die Einverständniserklärung wird ein Passus eingefügt, in dem die Bereitschaft zur Durchführung des Telefoninterviews mit entsprechenden Kontaktaufnahmen durch geschulte UKE-Interviewerinnen erbeten und dokumentiert wird. Bei vorliegender Einwilligung zur Teilnahme werden dem Universitätsklinikum Hamburg-Eppendorf Name und Telefonnummer und Pseudonym des/r jeweiligen Patienten/In vom betreuenden ZSE mitgeteilt.

Für die Telefoninterviews werden aus der Grundgesamtheit der zu T1 ankommenden PatientInnen, die sich bereit erklärt haben an den Telefoninterviews teilzunehmen, jeweils Häufigkeiten per Cluster errechnet und daraus zufällig 2-5 PatientInnen identifiziert. Die Teilnehmer werden stratifiziert und gleichanteilig nach Altersgruppen (12-18, bis 40, über 40 Jahre), Geschlecht und Beschwerdelast (niedrig, hoch) aufgeteilt. Mit dieser zufällig gezogenen Stichprobe von 10 % der Gesamtstichprobe aus der Kontrollgruppe und Interventionsgruppe werden die qualitativen Telefoninterviews jeweils zu Beginn (prä: Fragen zum aktuellen Gesundheitszustand und Erwartung an den diagnostischen und Versorgungsprozess) und zwölf Monate nach der Erstbefragung (post: Gesundheitszustand und Ergebnisse der diagnostischer und Versorgungsprozess, Erfahrungen und Zufriedenheit) durchgeführt.

Die leitfadengestützten Interviews werden von geschulten wissenschaftlichen MitarbeiterInnen des Instituts für medizinische Psychologie am Universitätsklinikum Hamburg-Eppendorf durchgeführt. Die Interviews beziehen standardisierte Messinstrumente ein (u.a. SF-8 und ZUF-8 Fragebogen), haben aber auch einen Anteil an geschlossenen und offenen Fragen zu Erwartungen an den (prä) und Bewertung des diagnostischen und Versorgungsprozesses (post). Für jedes Telefoninterview sind 30 – 45 Minuten eingeplant. Alle Interviews werden digital aufgezeichnet und zusätzlich handschriftlich protokolliert. Dabei werden die jeweiligen Fragen den Teilnehmern einzeln vorgelesen. Die Audiodatei wird mithilfe des Programmes f4 anschließend wörtlich transkribiert. Hierbei werden Pausen mit drei Auslasspunkten in Klammern (...) gekennzeichnet. Wörter die besonders betont werden, werden durch GROSSSCHREIBUNG gekennzeichnet und unverständliche Wörter werden mit (unv.) markiert. Alle gesprochenen Stellen werden mit einer Zeitmarke versehen und die interviewende Person durch ein „I“, die befragte Person durch ein „B“ gekennzeichnet um eine anonymisierte Auswertung zu gewährleisten. Jegliche Kennzeichnungen von Personen oder personenbezogenen Daten werden bei der Transkription mit XXX unkenntlich gemacht. Der Name des Teilnehmers wird jedoch durch das persönliche Pseudonym ersetzt.

Die Audiodateien der Telefoninterviews werden bis zum Abschluss der Transkription auf einer verschlüsselten externen Festplatte in einem verschlossenen Schrank am Institut für Medizinische Psychologie des Universitätsklinikums Hamburg-Eppendorf verwahrt und ein Jahr nach Projektende gelöscht. Die pseudonymisierten Transkripte werden für die Dauer von 10 Jahren auf dem sicheren Server der Arbeitsgruppe „Lebensqualität“ am Institut für Medizinische Psychologie des Universitätsklinikums Hamburg-Eppendorf gespeichert. Nur befugte Personen, die der Arbeitsgruppe angehören, haben Zugriff auf diesen Server.

Die Teilnahme an den Telefoninterviews der Studie ist freiwillig. Es entstehen keine Nachteile bei einer Nicht-Teilnahme. Bereits eingeschlossene Teilnehmer können jederzeit und ohne Angabe von Gründen ihr Einverständnis zur Teilnahme zurücknehmen, ohne dass dadurch Nachteile entstehen. Wenn ein Teilnehmer seine Einwilligungserklärung widerruft, werden die bereits erhobenen Daten gelöscht. Sind die Daten bereits anonymisiert, ist eine Löschung nicht mehr möglich.



Die transkribierten, anonymisierten Aussagen werden inhaltsanalytisch mithilfe des qualitativen Analyseprogrammes MAXQDA (8) ausgewertet. Hierbei werden die Daten nach der Methode der zusammenfassenden qualitativen Inhaltsanalyse nach Mayring (2008) (9) von zwei unabhängigen Auswertern analysiert. Somit wird eine große Materialmenge induktiv ausgewertet, aber gleichzeitig bleibt die Anbindung an den Leitfaden bestehen. Vor allem werden so relevante Statements bezüglich der Behandlungserwartung und Behandlungszufriedenheit identifiziert und codiert. Da die Pseudonymisierung projektübergreifend angelegt ist, ist eine Zusammenführung der Daten aus dem Interview und der Fragebogenerhebung, unter Einbeziehung klinischer Daten, möglich. Für die Auswertung des gesamten Datensatzes wird - nach File-Closing jeweils zu T1 und dann insgesamt nach Erhebungsende zu T2 - im Studienprotokoll des Projekts festgelegt, welche Fragestellungen mit welchen Verfahren von welchen Projektpartnern federführend durchgeführt werden, und wie die Publikationen aus dem Datensatz gehandhabt werden.

Von dem Erhebungszentrum in Hamburg geht der pseudonymisierte Datensatz zu zwei Zeitpunkten an die Studienzentrale zur Komplettierung des Datensatzes in der Hauptstudienbank jeweils drei Monate nach Beendigung der Interviews zu T1 und zu T2. Umgekehrt kann für die detaillierte Inhaltsanalyse der Patientenstatements aus den offenen Fragen das IMP Hamburg eine Anfrage an die Studienzentrale stellen, um relevante klinische und psychosoziale Daten, sowie Daten aus den quantitativen Befragungen als Hintergrundinformationen zur Einordnung der Patientenäußerungen zu erhalten.

#### Qualitative Untersuchung zur Zufriedenheit der Ärzte und Lotsen

Des Weiteren ist eine einmalige qualitative und quantitative Untersuchung zur Zufriedenheit der Ärzte mit der neuen Versorgungsform vorgesehen. Die Zufriedenheit der Ärzte und Lotsen mit der NVF erfolgt durch eine webbasierte Befragung, die auf Basis von Fokusgruppen konstruiert wird. Die Anzahl der vorbereitenden Fokusgruppen richtet sich nach der Methode des „theoretical sampling“ (5). Die Auswahl der Population orientiert sich demnach nicht nach der Repräsentativität, sondern nach der theoretischen Bedeutsamkeit für die Untersuchungsfrage bis eine „theoretische Sättigung“ erreicht ist. Erwartet werden 3 Fokusgruppen mit etwa 10 Teilnehmern. Die Fokusgruppendifkussionen werden von geschulten

wissenschaftlichen Mitarbeitern und Mitarbeiterinnen des Projektes ZSE-DUO durchgeführt. Die Fokusgruppen werden jeweils etwa 1 Stunde dauern. Die Gespräche werden digital aufgezeichnet. Die Audiodateien werden ausschließlich auf internen Servern verwahrt und nach Abschluss der Transkription und inhaltsanalytischen Auswertung (wie in dem zuvor beschriebenen Prozedere) gelöscht. Die anonymisierten Transkripte werden für den Zeitraum von 10 Jahren datenschutzkonform aufbewahrt und danach gelöscht.

Die Stichprobe zur Ärztebefragung deckt also die in die NVF eingebundenen Ärzte ab (Vollerhebung). Erhobene Outcomes sind wahrgenommene Auswirkungen der NVF, eingeschätzte Qualität der NVF und deren Determinanten (Erfolgs- und Misserfolgskriterien) sowie die Zufriedenheit bzw. Akzeptanz mit der NVF. Den Link zu den aus den Fokusgruppen entstandenen, standardisierten Fragebögen erhalten pro ZSE gleichanteilig 10 beteiligte Ärzte inkl. der fachärztlichen Lotsen per verschlüsselten Mailverkehr (insgesamt ca. 110). Der Fragebogen wird online auf einer geschützten Plattform ausgefüllt. Die Ergebnisse der Befragung werden heruntergeladen, online gelöscht und auf einem internen Server der Medizinischen Hochschule Hannover aufbewahrt, mittels SPSS ausgewertet und nach 10 Jahren gelöscht.

Gesundheitsökonomische Evaluation der Maßnahme (Center for Health Economics and Research Hannover (CHERH), Medizinische Hochschule Hannover)

Im Rahmen der Evaluation ist eine gesundheitsökonomische Analyse der neuen Versorgungsform geplant. Dafür werden quantitative Primär- und Sekundärdaten von Patientenstichproben mit einer unklaren Diagnose und Verdacht auf eine seltene Erkrankung der IKK gesund plus, Techniker Krankenkasse (TK) und der AOK Hessen sowie möglicherweise weiterer kooperierender Krankenkassen mittels Patientenidentifikationsnummer vom Center for Health Economics and Research Hannover (CHERH), Medizinischen Hochschule Hannover, Institut für Epidemiologie, Sozialmedizin und Gesundheitssystemforschung miteinander verknüpft (sog. Datenlinkage) und ausgewertet. Hierbei handelt es sich um ein etabliertes Verfahren, um die Validität der Ergebnisse zu steigern. Primärdaten zur Erwartung und Zufriedenheit, zum Gesundheitszustand sowie zur sektorenübergreifender Leistungsanspruchnahme und Diagnosestellung stammen hierbei aus Fragebögen und

sektorenspezifischen, ärztlichen Falldokumentationen. Sie werden gemeinsam mit sektorenübergreifenden Routinedaten der Krankenkassen (Sekundärdaten) ausgewertet.

Die Primärdaten werden dabei an den einzelnen ZSE pseudonymisiert erhoben. Die finale Speicherung der pseudonymisierten Daten erfolgt auf einem geschützten Server des IKE-B, die für die Evaluation erforderlichen pseudonymisierten Daten werden gesichert an die Medizinische Hochschule Hannover übermittelt. Die gesundheitsökonomischen Daten werden in Verantwortung der Medizinischen Hochschule Hannover verarbeitet und gespeichert. Nach Einholung einer separaten Einverständniserklärung zur Teilnahme an den gesundheitsökonomischen Analysen wird die Krankenversicherungsnummer des/der PatientIn am ZSE erfragt und gemeinsam mit dem Namen sowie der Patientenidentifikationsnummer für die Pseudonymisierung vom jeweiligen ZSE an die Krankenkasse übermittelt. Die Krankenkasse selektieren pro PatientIn die Leistungsdaten, trennen den Namen und Krankenversicherungsnummer ab und übermittelt dann die angeforderten Leistungsdaten (ambulante und stationäre Behandlungen, Rehabilitationsleistungen, Arznei-, Heil- und Hilfsmittel sowie Zeiten der Arbeitsunfähigkeit) pseudonymisiert an die Medizinischen Hochschule Hannover. Die Medizinischen Hochschule Hannover erhält die für die Evaluation benötigten pseudonymisierten Sekundärdaten von der IKK gesund plus, TK und möglicherweise weiteren kooperierenden Krankenkassen ohne die Krankenversicherungsnummer und Namen über einen geschützten Server.

Die in der Medizinischen Hochschule Hannover vorliegenden Primärdaten weisen dieselben Patientenidentifikationsnummern auf wie die Sekundärdaten, so dass eine Verknüpfung und Auswertung der Daten durch die Medizinische Hochschule Hannover möglich ist. Die Medizinischen Hochschule Hannover bereitet die Daten auf (z. B. Abgleich, ob alle Daten geliefert wurden) und setzt Validierungsverfahren (Plausibilitäts- und Vollständigkeitsprüfungen) um, die bei Unklarheiten ggf. in Abstimmung zwischen den Krankenkassen und beteiligten ZSEs erfolgt. An der Medizinischen Hochschule Hannover sind alle übermittelten Daten bereits pseudonymisiert und ausschließlich den Projektmitarbeitern zugänglich. Die gesundheitsökonomischen Analysen berücksichtigen a) Kosten der Diagnosestellung, b) die Lebensqualität der Patienten (EQ-5D), c) das inkrementelle

Kosteneffektivitätsverhältnis (Kosten pro gesicherter Diagnose, Kosten pro qualitätsadjustiertem Lebensjahr (QALY)) und d) Kosten der Therapie, die auf der Diagnosestellung basieren. Aus dem inkrementellen Kosteneffektivitätsverhältnis aus Kassenperspektive lassen sich Zusatzkosten (oder ggf. auch Kosteneinsparungen) für die NVF gegenüber der Regelversorgung ableiten, indem die Gesamtnutzen und -kosten der beiden Vergleichsalternativen bestimmt und gegenübergestellt werden. Für multivariate Analysen werden zudem soziodemografische, arbeitsbezogene und medizinische Variablen verarbeitet.

Um die Diagnosekosten und Therapiekosten ermitteln zu können, werden zunächst fallbezogene Prozesse identifiziert und analysiert. Aufbauend auf der Prozessanalyse wird der gesamte Ressourcenverbrauch erfasst und ökonomisch bewertet. Prozessanalyse und Erfassung des Ressourcenverbrauchs erfolgen mittels Befragungen und Beobachtungen in Stationsvisiten. Die monetäre Bewertung der Leistungen folgt gängigen Bewertungssätzen (6, 7). Zudem werden für die Diagnosekosten Daten aus der Dokumentation der ZSEs (z.B. Prozessschritte der fachärztlichen Koordinatoren und psychiatrisch-psychosomatischen Lotsen) und der Patientenbefragung (zu T1 und T2; z. B. Lebensqualität) genutzt, während für die Therapiekosten Abrechnungsdaten der beteiligten Krankenkassen verwendet werden. Für letzteres werden Sekundärdatenanalysen mittels Routinedaten durchgeführt. Sämtliche pseudonymisierte Daten werden auf einem verschlüsselten und gesicherten Netzlaufwerk auf dem Server des Rechenzentrums der Medizinischen Hochschule Hannover gespeichert und verarbeitet. Diese Daten werden nach 10 Jahren nach Projektabschluss gelöscht.

## **7.6 Studiendatenbank Würzburg**

Die Hauptdatenbank der Studie wird mittels MySQL ® programmiert, inkl. finalem Code und Prüfungen zu Plausibilität und Vollständigkeit. Alle Daten werden in der Hauptdatenbank mittels Pseudonymen ohne personenidentifizierende Daten verarbeitet. Die CRFs werden regelmäßig (mind. 1x/Woche) durch Datenmanager bzw. geschultes Personal gescannt und die elektronisch übertragenen Daten in die Hauptdatenbank übertragen. Die in die Hauptdatenbank gespeicherten Daten werden über VBA-programmierte Algorithmen monatlich auf Vollständigkeit und Plausibilität

überprüft. Die Sicherheit der Hauptdatenbank wird täglichen Back-ups auf Servern des Universitätsklinikums gewährleistet.

Die Datenbank der Studie wird am Institut für Klinische Epidemiologie und Biometrie (IKE-B) der Universität Würzburg geführt. Der Zugriff auf die Datenbank ist Datenmanagern, Biometrikern sowie der Studienleitung vorbehalten und wird mittels der Verteilung von dezidierten Zugriffsrechten sichergestellt

## **7.7 Studiendatenbank Hannover und Hamburg**

Die Auswertungen der Primär- und teilweise der Sekundärhypothesen werden in Hamburg und Hannover durchgeführt. Dafür werden die für die Auswertung benötigten Auszüge der pseudonymierten Hauptdatenbank an das Institut für Medizinische Psychologie am Universitätsklinikum Hamburg-Eppendorf sowie an das Center for Health Economics and Research Hannover (CHERH), Medizinische Hochschule Hannover, Institut für Epidemiologie, Sozialmedizin und Gesundheitssystemforschung datenschutzkonform (Airwatch Content Locker - #DCO/15) übermittelt. Das Center for Health Economics and Research Hannover (CHERH), Medizinischen Hochschule Hannover, Institut für Epidemiologie, Sozialmedizin und Gesundheitssystemforschung erhebt mittels eines separaten Fragebogen zu Studienbeginn und im 12-Monats-Follow-up zusätzliche gesundheitsökonomische Daten durch die Patienten. Diese Angaben werden durch Mitarbeiter des CHERH in die institutseigene Datenbank des Centers for Health Economics and Research Hannover (CHERH), Medizinischen Hochschule Hannover, Institut für Epidemiologie, Sozialmedizin und Gesundheitssystemforschung eingepflegt und gespeichert.

Ebenso werden die durch das Institut für Medizinische Psychologie am Universitätsklinikum Hamburg-Eppendorf qualitativ erhobenen Informationen durch die Mitarbeiter des Institutes in der Datenbank von dem Institut für Medizinische Psychologie am Universitätsklinikum Hamburg-Eppendorf eingepflegt und gespeichert.

## 8. BIOMETRISCHE ASPEKTE

### 8.1 Endpunkte

Der primäre Endpunkt ist der anteilige Unterschied an PatientInnen, die im Beobachtungszeitraum eine gesicherte Diagnosestellung erhalten, welche die Symptomatik erklärt (SE, psych. oder andere Erkrankung, ggf. in Kombination).

Hierzu wird ein Auszug der Daten (Arzt-Fragebogen) der ZSEs aus einer für alle Zentren einheitlichen elektronischen Falldokumentation zum Zeitpunkt des Erstkontakts sowie ein Jahr danach ausgewertet.

Die sekundären Endpunkte sind die durchschnittliche Zeitdauer bis zur Diagnosestellung von a) SE, b) psychiatrischen/psychosomatischen (psych.) und c) weiteren Erkrankungen sowie zum Ausschluss einer SE als Hauptdiagnose, Diagnosekosten und inkrementelles Kosteneffektivitätsverhältnis im Vergleich zur Regelversorgung, Patientenzufriedenheit, gesundheitsbezogene Lebensqualität der PatientInnen, Zufriedenheit der Ärzte mit NVF und die Identifizierung von Screening-Fragen zur Diagnosestellung.

### Fallzahlplanung

Es wird angenommen, dass durch die NVF der Anteil gesicherter Diagnosen von derzeit ca. 30 % (KG) auf 40 % (IG) gesteigert werden kann. Eine solche Steigerung um ein Drittel vordiagnostizierter Erkrankungsbilder ist im Konsensus der Expertengruppe als eine klinisch relevante Verbesserung der Versorgung anzusehen. Der Testaufbau sieht ein Signifikanzniveau von 5 %, eine Power von 90 %, eine Drop-Out-Rate von 20 % und einen erwarteten Intracluster-Korrelationskoeffizient von 0,01 bei einer ursprünglich angestrebten gleichen Rekrutierungszahl je Cluster vor (10). Es wurde für den möglichen Clustereffekt (Designereffekt) nach Chakraborty korrigiert (10). Es wird ein Test auf Unterschiede mittels Fishers' exact test durchgeführt. Demnach ist für eine Proportionsanalyse zum Nachweis der angenommenen Effekte eine Stichprobengröße von jeweils  $n=682$  PatientInnen in IG und KG erforderlich (11, 12). Aufgrund des Rekrutierungsverlaufs wurde eine Veränderung der Fallzahlplanung auf Ebene der Zentren vorgenommen: Die Gesamtfallzahlen in der Kontroll- und der Interventionsgruppe sind identisch, allerdings kann jedes Zentrum unterschiedlich viele Patienten in die Kontroll- und Interventionsgruppe einschließen. Es wurden

Fallzahlen zwischen 24 und 93 Patienten je Zentrum und Untersuchungsgruppe festgelegt. Dadurch wurde eine Änderung des statistischen Ansatzes (Metaanalyse mit randomisierten Effekten der zentrumsspezifischen Odds-Ratios) und Powerkalkulation mittels Simulation erforderlich. Bei Annahme einer Gesamtstichprobengröße von jeweils  $n=682$  Patienten in IG und KG ergab die Powerkalkulation mittels Simulation mit 100.000 Zufallsstichproben eine Power von 80,8 %.

## **8.2 Verfahren zur Datenanalyse**

Die Auswertungen umfassen deskriptive Analysen der Daten in Form der Bestimmung statistischer Kenngrößen wie Häufigkeiten mit Prozentangaben, Mittelwert und Varianz (metrische Skalierung, Variablen mit annähernd symmetrischer Verteilung), Median und Interquartilsbereich (ordinale Skalierung sowie metrische Skalierung bei deutlich schief verteilten Variablen). Um anteilige Unterschiede zwischen KG und IG an PatientInnen festzustellen, die im Beobachtungszeitraum eine gesicherte Diagnosestellung erhalten, wird eine Metaanalyse mit randomisierten Effekten der zentrumsspezifischen Odds-Ratios durchgeführt. Außerdem werden Multilevel-Modellierungen, Chi-Quadrat-Tests sowie eine Kostenanalyse aus Kassenperspektive (QALY, Bootstrapping) und ROC-Kurven berechnet werden um die sekundären Hypothesen zu testen.

## **8.3 Analysepopulationen**

Erhebung der Daten über psychische und somatische Beschwerden, Lebensqualität, Diagnose, Zufriedenheit mit der Behandlung am ZSE sowie Nachbefragung nach 12 Monaten bei PatientInnen mit unklarer Diagnose, die sich erstmalig an einem der am Projekt ZSE-DUO teilnehmenden ZSE vorstellt ( $n = 1364$ ).

## **8.4 Auswertungszeitpunkte**

Die Daten werden nach Abschluss des Follow-ups (40 Monate nach Studienbeginn) auf die Endpunkte hin ausgewertet.

Die Auswertung des primären Endpunkts erfolgt in Q2 2022, die Auswertungen für den 1., 2. und 3. sekundären Endpunkt sind in Q3 2022 sowie für den 5. sekundären

Endpunkt in Q2 2022 abgeschlossen. Die Auswertung des 4. Endpunktes erfolgt in Q1 2022 sowie Q2 2022.



## **9. QUALITÄTSSICHERUNG UND -KONTROLLE**

Sämtliche Abläufe (Patientenaufklärung, Behandlung in der Neuen Versorgungsform, Telefon-Interview) erfolgen nach verbindlichen, detaillierten und zuvor von der Studienleitung genehmigten Standards Operating Procedures (SOPs). Die SOPs werden durch die Verantwortlichen regelmäßig (mindestens jährlich) überprüft und gegebenenfalls angepasst.

### **Datenschutz**

Das Gesamtkonzept zu Datenverarbeitung und Datenschutz wurde vor Beginn der Studie den behördlichen Datenschutzbeauftragten jeder datenverarbeitenden Institution zur Prüfung vorgelegt und eine datenschutzrechtliche Freigabe beantragt. Für Würzburg und Hannover liegen die entsprechenden Datenschutzfreigaben vor. Für die Datenverarbeitung in Hamburg ist eine datenschutzrechtliche Beratung angefragt.

## **10. PUBLIKATION DER ERGEBNISSE**

Die Evaluierung der neuen Versorgungsform, soll wissenschaftlich publiziert werden. Mitarbeiter der beteiligten Institutionen stellen hierzu Anfragen zu Publikationsvorhaben an die Studienleitung. Die beantragten Publikationen werden durch die Steuerungsgruppe des Projekts beraten und entschieden. Es bestehen keinerlei Einschränkungen bzgl. der wissenschaftlichen Publikation der Ergebnisse. Die Erstellung eines Manuskriptes sowie die Regelung der Autorenschaft erfolgt gemäß den Vorgaben des „International Committee of Medical Journal Editors“ für „Uniform Requirements for Manuscript Submitted to Biomedical Journals“, (<http://www.icmje.org>). In allen Publikationen ist das Akronym „ZSE-DUO“ des Projekts im Titel aufzuführen.

## **11. ETHISCHE GRUNDLAGEN**

### **11.1 Ethikvotum**

Vor Beginn der Studie wird ein positives Votum der zuständigen Ethik-Kommission der Universität Würzburg eingeholt. Auf der Basis des Votums aus Würzburg werden entsprechende Voten von allen teilnehmenden ZSEs und Instituten bei ihren zuständigen Ethik-Kommissionen beantragt.

Für Protokolländerungen, die über bloße technische Modifikationen hinausgehen, wird im Zuge eines Amendements ein erneutes Votum eingeholt. Votumspflichtig sind Änderungen insbesondere dann (aber ohne Beschränkung darauf), wenn Untersuchungen oder Befragungen hinzugenommen oder in entscheidender Weise erweitert werden.

Das Gesamtkonzept zu Datenverarbeitung und Datenschutz wird vor Beginn der Studie dem Datenschutzbeauftragten der Universität Würzburg sowie dem Datenschutzbeauftragten des Universitätsklinikum Würzburg zur Prüfung vorgelegt und vor Beginn der Studie ein positives Votum eingeholt.

### **11.2 Probandenaufklärung**

Die Teilnehmerinformation für PatientInnen sowie die Einwilligungserklärung finden sich in der Anlage zu diesem Studienprotokoll (siehe „Teilnehmerinformation, Einwilligungserklärung“).

Bei der Aufklärung der potentiellen Teilnehmer ist insbesondere auf das Verständnis folgender Punkte zu achten und ggf. durch Rückfragen sicherzustellen:

- Art der Daten, die erhoben werden
- Europäischen Datenschutz-Grundverordnung
- Freiwilligkeit der Teilnahme
- Widerrufbarkeit der Einwilligung ohne Nachteile und ohne Angabe von Gründen
- das Recht, weitere Fragen zu stellen
- das Auskunftsrecht über gespeicherte Daten

#### A) Aufklärung und Einwilligung bei einwilligungsfähigen PatientInnen:

Ein(e) Studienarzt/-ärztin erklärt mündlich und schriftlich den Sinn und Zweck sowie die Inhalte dieser Studie, die erwartete Dauer sowie die potentiellen Vorteile und Risiken einer Studienteilnahme. Der Patient erhält eine schriftliche Fassung der Patienteninformation und -einwilligung. Jeder potentielle Studienteilnehmer erhält ausreichend Zeit und Gelegenheit, Fragen zu stellen, und wird darüber informiert, dass er jederzeit seine Einwilligung ohne Angabe von Gründen zurückziehen kann, ohne dass ihm hieraus Nachteile entstehen.

Nach der mündlichen und schriftlichen Aufklärung wird der Patient gefragt, ob er an der Studie teilnehmen möchte und bereit ist, die Patienteneinwilligung nach einer ausreichenden Bedenkzeit zu unterschreiben und persönlich zu datieren. Nur wenn der Patient freiwillig die Patienteneinwilligung unterschreibt, darf ein Studieneinschluss erfolgen. Im Anschluss wird die Patienteneinwilligung auch vom Studienarzt unterschrieben und datiert. Ist der Patient nicht in der Lage, eigenhändig zu unterschreiben, muss ein Zeuge die erfolgte mündliche Aufklärung durch Unterschrift bestätigen. Die Einwilligung muss vor jeglicher studienbedingter Maßnahme unterschrieben und datiert vorliegen.

Die unterschriebene Patienteneinwilligung verbleibt im Prüfarztordner. Der Studienarzt dokumentiert auf dem entsprechenden CRF, dass der Patient die Patienteneinwilligung unterschrieben hat. Die Patienteninformation und -einwilligung werden geändert, sobald neue Informationen in Zusammenhang mit der Studie bekannt werden, die Einfluss auf die Bereitschaft des/r Patienten/In zur Teilnahme haben könnten. Ebenfalls wird der Patient über jede Protokolländerung informiert, die eine Änderung der Patienteninformation und -einwilligung zur Folge hat. Der Patient wird vom Studienarzt oder Projektmitarbeiter gefragt, ob er auch nach geänderter Sachlage in der Studie verbleiben möchte und ob er bereit ist, die geänderte Patienteneinwilligung zu unterschreiben. Jede Änderung der Patienteninformation und -einwilligung muss zuvor von der Ethik-Kommission genehmigt worden sein.

#### B) Einwilligung des gesetzlich bestimmten Vertreters oder Angehörigen:

Bei nicht-einwilligungsfähigen PatientInnen erfolgt die Information über das Projekt soweit möglich auch an den/die Patienten/In in mündlicher und schriftlicher Form. Für Kinder und Jugendliche gibt es hierzu eine vereinfachte Patienteninformation. Soweit

möglich, werden auch Kinder, Jugendliche und nicht einwilligungsfähige Erwachsene um ihr mündliches und schriftliches Einverständnis gebeten.

Die Information und Einwilligung durch die Erziehungsberechtigten, einen gesetzlichen Vertreter oder den Angehörigen erfolgt ebenfalls mündlich und schriftlich.

Abbruch der Studienteilnahme:

Alle PatientInnen haben zu jeder Zeit das Recht, die weitere Teilnahme an dem Register ohne Angabe von Gründen zu widerrufen. Die Teilnahme der/s Patienten/In ist auf deren Wunsch unverzüglich abubrechen. Der Untersucher sollte sich bemühen, den Grund dafür herauszufinden und diesen in die Studienakte einzutragen.

Ein/e PatientIn kann nach Ermessen des Studienarztes aus der Studie ausscheiden. Der Grund hierfür sollte in der Studienakte umfassend dokumentiert werden. Sollte der/ie PatientIn im Laufe der Studie einen Zustand entwickeln, der ihre Teilnahme an der Studie nach den Ausschlusskriterien verhindert hätte, muss sie die Studie unverzüglich abbrechen. Die Begründungen dafür sollten in der Studienakte umfassend dokumentiert werden.

Insgesamt gelten folgende Kriterien als Abbruchkriterien für die einzelne Patienten/In:

- Wunsch der/s Patienten/In
- Keine Nachbefragung mehr möglich, Non-Compliance

### **11.3 Verwendung, Speicherung und Weitergabe der Daten**

Die Speicherung und Verarbeitung aller Registerdaten erfolgt generell unter dem jeweilig vergebenen Pseudonym. Nur nach Einverständnis der PatientInnen erfolgt eine Zusammenführung der klinischen Daten, der Routinedaten der Krankenkassen und der Nachbefragung nach Maßgabe der behördlichen Datenschutzbeauftragten. Die unterschriebenen Einverständniserklärungen mit Klarnamen werden in der behandelnden Klinik unter Verschluss gehalten.

Von den für eine Studienteilnahme angesprochenen Personen, die nicht TeilnehmerInnen geworden sind, werden folgende Angaben elektronisch verarbeitet: Geschlecht, Altersgruppe, Beschwerdedauer, Grund für Nichtteilnahme. Dies ist notwendig, um in wissenschaftlichen Publikationen den Screeningprozess und

eventuelle Selektionen adäquat beschreiben zu können. Diese elektronische Erfassung und Verarbeitung erfolgt ausschließlich anonym. Das Screeninglog wird am Institut für Klinische Epidemiologie und Biometrie der Universität Würzburg ausgewertet.

## 12. LITERATUR

1. Geschäftsstelle des Nationalen Aktionsbündnisses für Menschen mit Seltenen Erkrankungen.  
  
Nationaler Aktionsplan für Menschen mit Seltenen Erkrankungen. Handlungsfelder, Empfehlungen und Maßnahmenvorschläge. Bonn, 2013
2. Quittner AL, Goldbeck L, Abbott J, Duff A, Lambrecht P, Solé A, Tibosch MM, Bergsten Brucefors A, Yüksel H, Catastini P, Blackwell L, Barker D Prevalence of depression and anxiety in patients with cystic fibrosis and parent caregivers: results of The International Depression Epidemiological Study across nine countries. *Thorax* 2014;69:1090-7.
3. Muir. The Rare Reality – an insight into the patient and family experience of rare disease. 2016.  
<http://www.raredisease.org.uk/media/1588/the-rare-reality-an-insight-into-the-patient-and-family-experience-of-rare-disease.pdf>.
4. Nunn R. "It's not all in my head!" - The complex relationship between rare diseases and mental health problems. *Orphanet J Rare Dis.* 2017 Feb 27;12(1):29.
5. Glaser, Strauss (1999), *The Discovery of Grounded Theory: Strategies for Qualitative Research.* Transaction Chicago.
6. Bock, Brettschneider, Seidl, Bowles, Holle, Greiner, König (2015), Ermittlung standardisierter Bewertungssätze aus gesellschaftlicher Perspektive für die gesundheitsökonomische Evaluation. *Das Gesundheitswesen*; 77: 53-61.
7. Krauth, Hessel, Hansmeier, Wasem, Seitz, Schweikert (2005), Empirische Bewertungssätze in der gesundheitsökonomischen Evaluation – ein Vorschlag. *Das Gesundheitswesen*; 67: 736- 746.
8. MAXQDA 12. (2015). MAXQDA - The Art of Data Analysis. Berlin: VERBI GmbH.

9. Mayring, P. (2008). Qualitative Inhaltsanalyse. Grundlagen und Techniken. Weinheim und Basel: 10. Auflage. Beltz Verlag.
10. Chakraborty, Moore, Carlo, Hartwell, Wright (2009), A simulation based technique to estimate intracluster correlation for a binary variable. Contemp Clin Trials.; 30: 71-80.
11. Bortz, Döring (2006), Forschungsmethoden und Evaluation für Human- und Sozialwissenschaftler, Springer Berlin Heidelberg, 4. Aufl.
12. Chenot (2009), Cluster-randomisierte Studien: eine wichtige Methode in der allgemeinmedizinischen Forschung. ZEFQ; 103: 475–480.
13. Neubauer, Zeidler, Lange, Graf von der Schulenburg 2017, Prozessorientierter Leitfaden für die Analyse und Nutzung von Routinedaten der Gesetzlichen Krankenversicherung, Baden-Baden: Nomos Verlagsgesellschaft.

## **13. ANHANG**

### **Patienteninformation**

Siehe Anlagen (Erwachsene, Gesetzliche Betreuung, Erziehungsberechtigte, Kinder und Jugendliche)

### **Einwilligungserklärung**

Siehe Anlagen (Erwachsene, Gesetzliche Betreuung, Erziehungsberechtigte, Fallkonferenz), Information und Einwilligung Krankenkassendaten, Einwilligung zur Fallkonferenz

### **Erhebungsinstrumente**

Siehe Anlage

- Anfragebogen ZSE
- Patientenfragebogen - Studienbeginn
- Patientenfragebogen – Follow-up
- Lotse Somatikfragebogen – Studienbeginn
- Lotse Psychosomatik Fragebogen - Studienbeginn
- Lotse Somatik/ Psychosomatik -Fragebogen – Follow-up
- Lotse Psychosomatik Fragebogen – Follow-up
- Lotse Somatik Fragebogen – Erfassung der Symptomatik
- Lotse Psychosomatik Fragebogen – Erfassung der Symptomatik
- Fragebogen Leistungserbringung
- EQ-5D
- SF-12
- PHQ-15
- GAD-7
- DSS-4



- SCL-K-9
- KIDSCREEN-10 (bei Jugendlichen)
- SDQ (bei Jugendlichen)
- ZUF 8
- Leitfaden Telefoninterview (Patienten)
- Gesundheitsökonomischer Fragebogen (Baseline, Follow-up)
- Routinedaten (siehe Tabelle 1)

**Tabelle 1 Variablenliste der angeforderten Sekundärdaten in Anlehnung an (13)**

| <b>Variable</b>                                | <b>Ausprägung</b>                                | <b>Anmerkung</b>                                                                                            |
|------------------------------------------------|--------------------------------------------------|-------------------------------------------------------------------------------------------------------------|
| Ambulante Versorgung                           |                                                  |                                                                                                             |
| Patientenidentifikationsnummer                 | Ziffernfolge oder Buchstaben- /Zahlenkombination | Pseudonymisierte Patienten-ID; dient als Primärschlüssel und zur personenbezogenen Zuordnung der Leistungen |
| Beginn der Leistungserbringung                 | TT.MM.JJJJ                                       | Behandlungsbeginn einer Arztleistung                                                                        |
| Ende der Leistungserbringung                   | TT.MM.JJJJ                                       | Behandlungsende einer Arztleistung                                                                          |
| Quartal (Jahr)                                 | Q.JJJJ                                           |                                                                                                             |
| Diagnosen                                      | 3- bis 5-stellige alphanumerische Systematik     | Quartalsweise Diagnosedokumentation der ICD-10-Diagnose                                                     |
| Diagnosesicherheit                             | V, G, A oder Z                                   | ICD-Diagnosesicherheit Verdacht (V), Gesichert (G), Ausschluss (A), (symptomloser) Zustand nach (Z)         |
| KV-Behandlernummer                             | Numerischer Ausdruck                             | 8. und 9. Ziffer gibt Auskunft über die Facharzttrichtung                                                   |
| Facharztgruppe                                 | 2-stellige Nummer                                | Falls keine Facharztgruppe verfügbar, dann KV-Behandlernummer                                               |
| Gebührenordnungsziffern/Leistungsziffern (EBM) | Numerischer Ausdruck                             | Gebührenordnungsziffer nach EBM                                                                             |
| Euro-EBM                                       | EBM in Euro                                      | Orientierungswert für Honorarhöhe in Euro                                                                   |
| Punktzahl gemäß EBM                            | Numerische Ziffer                                | Abgerechnete EBM-Punkte                                                                                     |

|                                      |                                                 |                                                                                                             |
|--------------------------------------|-------------------------------------------------|-------------------------------------------------------------------------------------------------------------|
| Anzahl Leistungen (je Einzelzeile)   | Numerischer Ausdruck                            | Anzahl                                                                                                      |
| Kosten                               | Euro-Betrag                                     | Extrabudgetäre Leistung/Sachkosten aus Kassenperspektive in Euro                                            |
| OPS-Ziffern                          | Numerischer Ausdruck                            | Klassifikation bei ambulanten Operationen                                                                   |
| Art der Inanspruchnahme              | Original-, Sekundär-, Not- oder Vertretungsfall | Klassifikation eines Behandlungsfalls                                                                       |
| Zuzahlungen                          | Euro-Betrag                                     | z.B. Praxisgebühr                                                                                           |
| Interne Fallnummer                   | Numerischer Ausdruck                            | Interne Fallnummer zur Verknüpfung der Tabellen                                                             |
| Stationäre Versorgung                |                                                 |                                                                                                             |
| Patientenidentifikationsnummer       | Ziffernfolge oder Buchstaben-/Zahlenkombination | Pseudonymisierte Patienten-ID; dient als Primärschlüssel und zur personenbezogenen Zuordnung der Leistungen |
| Tag der Aufnahme                     | TT.MM.JJJJ                                      | Aufnahmedatum                                                                                               |
| Tag der Entlassung                   | TT.MM.JJJJ                                      | Entlassungsdatum                                                                                            |
| Hauptdiagnose (bei Entlassung)       | 3- bis 5-stellige alphanumerische Systematik    | ICD-10-Diagnose                                                                                             |
| Hauptdiagnose eines Krankenhausfalls | 3- bis 5-stellige alphanumerische Systematik    | ICD-10-Diagnose                                                                                             |
| Nebendiagnosen                       | 3- bis 5-stellige alphanumerische Systematik    | Weitere abrechnungsrelevante Diagnosen und Komplikationen                                                   |
| OPS                                  | 5-stellige Nummer                               | OPS-Schlüssel (Hauptoperationsschlüssel)                                                                    |

|                                |                                                                                                   |                                                                                                                                  |
|--------------------------------|---------------------------------------------------------------------------------------------------|----------------------------------------------------------------------------------------------------------------------------------|
| Operationsdatum                | TT.MM.JJJJ                                                                                        | Tag der Operation                                                                                                                |
| DRG                            | 3- bis 5-stellige<br>alphanumerische<br>Systematik                                                | Abgerechnete DRG                                                                                                                 |
| Kosten DRG-Betrag              | Euro-Betrag                                                                                       | Kosten aus<br>Kassenperspektive in Euro                                                                                          |
| ICD Typ                        | Aufnahme-, Entlassungs-,<br>Haupt- oder<br>Nebendiagnose                                          | Herkunft der Diagnose                                                                                                            |
| Aufnahmegrund                  | z. B. Notfall                                                                                     | Grund der Aufnahme                                                                                                               |
| Entlassungsgrund               | Reguläre Entlassung,<br>Entlassung auf<br>Patientenwunsch,<br>Verlegung, Tod des<br>Patienten     | Grund der Entlassung                                                                                                             |
| Art der stationären Behandlung | Vollstationär, teilstationär,<br>vor-, nachstationär,<br>ambulante OP im<br>Krankenhaus, Sonstige | Art der stationären<br>Behandlung                                                                                                |
| IK-Nummer des Krankenhauses    | 10-stellige Nummer                                                                                | Anonymisierte<br>Identifikationsnummer der<br>Institution (ergänzt durch<br>die Art der Institution und<br>regionaler Zuordnung) |
| Aufnehmende Fachabteilung      |                                                                                                   |                                                                                                                                  |
| Entlassende Fachabteilung      |                                                                                                   |                                                                                                                                  |
| Arzneimittel                   |                                                                                                   |                                                                                                                                  |
| Patientenidentifikationsnummer | Ziffernfolge oder<br>Buchstaben-<br>/Zahlenkombination                                            | Pseudonymisierte<br>Patienten-ID; dient als<br>Primärschlüssel und zur<br>personenbezogenen<br>Zuordnung der Leistungen          |

|                                |                                                                               |                                                                                                             |
|--------------------------------|-------------------------------------------------------------------------------|-------------------------------------------------------------------------------------------------------------|
| ATC-Codierung                  | Alphanumerische Systematik                                                    | Code nach ATC-Klassifikation (sofern vorhanden)                                                             |
| PZN                            | Achtstellige Numerische Systematik                                            | Pharmazentralnummer                                                                                         |
| Datum der Ausstellung          | TT.MM.JJJJ                                                                    | Datum der Verordnungsblatt-Ausstellung                                                                      |
| Datum der Abgabe               | TT.MM.JJJJ                                                                    | Datum der Verordnungsblatt-Abgabe bei der Apotheke                                                          |
| Anzahl                         | Numerischer Ausdruck                                                          | Verordnete Menge je Einzelzeile (i.d.R. entspricht dies der Anzahl der Packungen)                           |
| Bruttokosten                   | Euro-Betrag                                                                   | Kosten in Euro (Apothekenabgabepreis)                                                                       |
| DDD                            | Einheit (g/mg/mcg/mcm) und Darreichungsform (nasal, oral, subkutan) oder Tage | Defined Daily Doses, definierte Tagesdosis                                                                  |
| Hilfsmittelkennzeichen         | ja/nein                                                                       | Angabe, ob es sich um ein Arzneimittel handelt                                                              |
| Zuzahlungen                    | Euro-Betrag                                                                   | Höhe der Zuzahlung der Patienten                                                                            |
| Heil- und Hilfsmittel          |                                                                               |                                                                                                             |
| Patientenidentifikationsnummer | Ziffernfolge oder Buchstaben-/Zahlenkombination                               | Pseudonymisierte Patienten-ID; dient als Primärschlüssel und zur personenbezogenen Zuordnung der Leistungen |

|                                |                                                                                                                         |                                                                                                                         |
|--------------------------------|-------------------------------------------------------------------------------------------------------------------------|-------------------------------------------------------------------------------------------------------------------------|
| Datum der Verordnung           | TT.MM.JJJJ                                                                                                              | Datum der<br>Verordnungsausstellung                                                                                     |
| Datum der Abgabe/Erbringung    | TT:MM.JJJJ                                                                                                              | Datum der<br>Leistungserbringung bei<br>Heilmitteln und<br>Rezepteinlösung bei<br>Hilfsmitteln                          |
| Positionsnummer                | Numerischer Ausdruck, z.<br>B. 5-stellige<br>Heilmittelpositionsnummer<br>und 10-stellige<br>Hilfsmittelpositionsnummer | Art des Heil-, Hilfsmittels                                                                                             |
| Anzahl                         | Numerischer Ausdruck                                                                                                    | Menge je Einzelteile                                                                                                    |
| Kosten                         | Euro-Betrag                                                                                                             | Kosten aus<br>Kassenperspektive                                                                                         |
| Arzt-/Behandlernummer          | Numerischer Ausdruck                                                                                                    |                                                                                                                         |
| Kennzeichen Hilfsmittel        | z.B. Neulieferung,<br>Reparatur, Wiedereinsatz<br>etc.                                                                  |                                                                                                                         |
| Verknüpfungsvariable           | Numerischer Ausdruck                                                                                                    | Verordnungs-ID zum<br>Verknüpfen der Tabellen                                                                           |
| Rehabilitation                 |                                                                                                                         |                                                                                                                         |
| Patientenidentifikationsnummer | Ziffernfolge oder<br>Buchstaben-<br>/Zahlenkombination                                                                  | Pseudonymisierte<br>Patienten-ID; dient als<br>Primärschlüssel und zur<br>personenbezogenen<br>Zuordnung der Leistungen |
| Beginn der Rehabilitation      | TT.MM.JJJJ                                                                                                              | Datum des<br>Rehabilitationsbeginns                                                                                     |
| Ende der Rehabilitation        | TT.MM.JJJJ                                                                                                              | Datum des<br>Rehabilitationsendes                                                                                       |

|                                     |                                                                                                                                                                                                         |                                                            |
|-------------------------------------|---------------------------------------------------------------------------------------------------------------------------------------------------------------------------------------------------------|------------------------------------------------------------|
| Anzahl Tage der Rehabilitation      | Numerischer Ausdruck                                                                                                                                                                                    | Dauer der Rehabilitation in Tagen                          |
| Diagnose                            | 3- bis 5-stellige alphanumerische Systematik                                                                                                                                                            | ICD-10-Diagnose                                            |
| Art der Rehabilitation              | AR: Anschlussheilbehandlung (max. 14 Tage nach Krankenhausentlassung), WR: Weiterführende Rehabilitation z.B. bei chronischen Erkrankungen; SR: Stationäre Rehabilitation, AR: Ambulante Rehabilitation | Rehabilitationssetting                                     |
| Kosten                              | Euro-Betrag                                                                                                                                                                                             | Kosten aus Kassenperspektive                               |
| Kostenträger der Rehabilitation     | Krankenkasse, BFA (Bundesversicherungsamt für Angestellte), Rentenkasse, Unfallversicherung)                                                                                                            | Kostenträger                                               |
| Kurgangskategorie                   | 1- bis 2-stelliger Code                                                                                                                                                                                 | Spezifizierung der Rehabilitation                          |
| IK-Nummer der Rehabilitationsklinik | 9-stellige Nummer                                                                                                                                                                                       | Identifikationsnummer der Institution                      |
| Arzt-/Behandlernummer               | Numerischer Ausdruck                                                                                                                                                                                    | Arztnummer oder KV-Behandlernummer des einweisenden Arztes |
| Arbeitsunfähigkeit und Krankengeld  |                                                                                                                                                                                                         |                                                            |

|                                    |                                                 |                                                                                                             |
|------------------------------------|-------------------------------------------------|-------------------------------------------------------------------------------------------------------------|
| Patientenidentifikationsnummer     | Ziffernfolge oder Buchstaben-/Zahlenkombination | Pseudonymisierte Patienten-ID; dient als Primärschlüssel und zur personenbezogenen Zuordnung der Leistungen |
| Beginn Arbeitsunfähigkeit (AU)     | TT.MM.JJJJ                                      | Anfangsdatum der AU                                                                                         |
| Ende Arbeitsunfähigkeit            | TT.MM.JJJJ                                      | Enddatum der AU                                                                                             |
| Anzahl Arbeitsunfähigkeitstage     | Numerischer Ausdruck (in Tagen)                 | Länge der AU in Tagen                                                                                       |
| Diagnosen                          | 3- bis 5-stellige alphanumerische Systematik    | ICD-10-Diagnose                                                                                             |
| Beginn Krankengeld                 | TT.MM.JJJJ                                      | Sofern vorhanden, Anfangsdatum der Krankengeldzahlung                                                       |
| Ende Krankengeld                   | TT.MM.JJJJ                                      | Sofern vorhanden: Enddatum der Krankengeldzahlung                                                           |
| Krankengeldtage                    | Numerischer Ausdruck                            | Sofern vorhanden: Tage des Krankengeldbezugs                                                                |
| Betrag Krankengeld                 | Geldbetrag in Euro                              | Kosten aus Kassenperspektive                                                                                |
| KV-Behandlernummer                 | Numerischer Ausdruck                            | 8. und 9. Ziffer gibt Auskunft über die Facharzttrichtung                                                   |
| Facharztgruppe                     | 2-stellige Nummer                               | Falls keine Facharztgruppe verfügbar, dann KV-Behandlernummer                                               |
| Psychiatrische Institutsambulanzen |                                                 |                                                                                                             |
| Patientenidentifikationsnummer     | Ziffernfolge oder Buchstaben-/Zahlenkombination | Pseudonymisierte Patienten-ID; dient als Primärschlüssel und zur                                            |



---

|                |                |                                               |
|----------------|----------------|-----------------------------------------------|
|                |                | personenbezogenen<br>Zuordnung der Leistungen |
| Buchungsdatum  | TT.MM.JJJJ     | Datum der Rechnung                            |
| Buchungsbetrag | Kosten in Euro | Kosten aus<br>Kassenperspektive               |
